# A CellAgeClock for expedited discovery of anti-ageing compounds

Celia Lujan<sup>1,\*</sup>, Eleanor J. Tyler<sup>2,\*</sup>, Simone Ecker<sup>3,\*</sup>, Amy P. Webster<sup>3,\*</sup>, Eleanor R. Stead<sup>1</sup>, Victoria E. Martinez Miguel<sup>1</sup>, Deborah Milligan<sup>2</sup>, James C. Garbe<sup>4</sup>, Martha R. Stampfer<sup>4</sup>, Stephan Beck<sup>3,#</sup>, Robert Lowe<sup>5,#</sup>, Cleo L. Bishop<sup>2,#</sup>, Ivana Bjedov<sup>1,#</sup>

## Affiliations

<sup>1</sup>: UCL Cancer Institute, Paul O’Gorman Building, University College London, 72 Huntley Street London, London WC1E 6DD, UK

<sup>2</sup>: Centre for Cell Biology and Cutaneous Research, Blizard Institute, Barts and The London School of Medicine and Dentistry, Queen Mary University of London, 4 Newark Street, London E1 2AT

<sup>3</sup>: Medical Genomics Group, UCL Cancer Institute, University College London, London WC1E 6BT, UK

<sup>4</sup>: Biological Systems and Engineering Division, Lawrence Berkeley National Laboratory, Berkeley, CA, United States

<sup>5</sup>: Centre for Genomics and Child Health, Blizard Institute, Barts and The London School of Medicine and Dentistry, Queen Mary University of London, 4 Newark Street, London E1 2AT

\*Equal contribution

#corresponding authors:

[i.bjedov@ucl.ac.uk](mailto:i.bjedov@ucl.ac.uk) [c.l.bishop@qmul.ac.uk](mailto:c.l.bishop@qmul.ac.uk) [rlope.compbio@gmail.com](mailto:rlope.compbio@gmail.com) [s.beck@ucl.ac.uk](mailto:s.beck@ucl.ac.uk)

## Abstract

We aim to improve anti-ageing drug discovery, currently achieved through laborious and lengthy longevity analysis. Recent studies demonstrated that the most accurate molecular method to measure human age is based on CpG methylation profiles, as exemplified by several epigenetics clocks that can accurately predict an individual’s age. Here, we developed CellAgeClock, a new epigenetic clock that measures subtle ageing changes in primary human cells *in vitro*. As such, it provides a unique tool to measure effects of relatively short pharmacological treatments on ageing. We validated the CellAgeClock against known longevity drugs such as rapamycin and trametinib. Moreover, we uncovered novel anti-ageing drugs, torin2 and Dactolisib (BEZ-235), demonstrating the value of our approach as a screening and discovery platform for anti-ageing strategies. The CellAgeClock outperforms other epigenetic clocks in measuring subtle ageing changes in primary human cells in culture. The tested drug treatments reduced senescence and other ageing markers, further consolidating our approach as a screening platform. Finally, we show that the novel anti-ageing drugs we uncovered *in vitro*, indeed increased longevity *in vivo*. Our method expands the scope of CpG methylation profiling from measuring human chronological and biological age from human samples in years, to accurately and rapidly detecting anti-ageing potential of drugs using human cells *in vitro*, providing a novel accelerated discovery platform to test sought after geroprotectors.

46

47 One of the remarkable achievements of developed countries is a continuous increase in life  
48 expectancy at birth, leading to greater longevity. However, a higher proportion of elderly in modern  
49 societies is accompanied by a steep increase in people suffering from age-related diseases. For  
50 example, cancer incidence rates, currently at 17 million worldwide, are expected to increase to 26  
51 million in 2040 (Wilson et al. 2019), and a similar rise is expected for Alzheimer's and Parkinson's  
52 disease (Reeve et al. 2014). Compression of late-life morbidity is, therefore, a priority to alleviate  
53 suffering in the elderly (Partridge et al. 2018) and to reduce a growing economic burden to society  
54 (Rae et al. 2010).

55 Critically, seminal discoveries in the biology of ageing showed that ageing is a malleable process  
56 and that down-regulation of major cellular nutrient signalling pathways, either glucose-sensing insulin  
57 signalling or amino acid-sensing target-of-rapamycin signalling, results in longevity and health  
58 improvement in all model organisms tested from yeast to mammals (Lopez-Otin et al. 2013). For  
59 instance, the long-lived mutants in *C. elegans* are protected from tumorous cell proliferation  
60 (Pinkston et al. 2006) and have reduced toxic protein aggregation (Cohen et al. 2006), while  
61 *Drosophila* show less deterioration in their hearts (Wessells et al. 2004). Long-lived mouse mutants  
62 are protected from osteoporosis, cataracts and skin pathology, as well as decline in glucose  
63 homeostasis, immune and motor function (Selman et al. 2008). The effect of these mutations is  
64 conserved from yeast to mammals, and it is, therefore, expected that if drugs replicate the biological  
65 impact of these changes, this could improve health in the elderly and prevent age-related disease. It  
66 is increasingly recognised that directly targeting ageing through pharmacological interventions, as  
67 opposed to specific age-related diseases, is a highly promising strategy for broad-spectrum disease  
68 protection (Niccoli and Partridge 2012). However, at present, there are only a handful of reliable anti-  
69 ageing drugs whose effects have been confirmed in mammals, such as rapamycin (Harrison et al.  
70 2009) and metformin (Martin-Montalvo et al. 2013). Crucially, there are currently no sufficiently  
71 reliable ageing biomarkers for testing drugs on human cells *in vitro*, and the development of a  
72 specialised epigenetic clock is a promising approach (Castillo-Quan et al. 2015; Field et al. 2018;  
73 Horvath et al. 2018; Bell et al. 2019; Horvath et al. 2019).

74 To accelerate the discovery workflow for anti-ageing drugs, we took advantage of the breakthrough  
75 in the ageing field which showed that epigenetic clocks provide the most accurate measurements of  
76 human age. For instance, the approximate error rate for the Skin and Blood clock is  $\pm 2.5$  years  
77 (maximal correlation coefficient 0,98) (Horvath et al. 2018). Epigenetic clocks surpass the accuracy  
78 of other ageing biomarkers such as telomere length and those based on transcriptomic,  
79 metabolomic or proteomic approaches, potentially because the latter approaches detect more  
80 transient and less stable cellular changes (Horvath 2013). Ageing is accompanied by overall CpG  
81 hypomethylation, whilst some CpG islands and gene regions become hypermethylated (Booth and  
82 Brunet 2016). Remarkably, only a small selection of the 56 million CpG sites in the diploid human

83 genome, coupled with computational algorithms, is sufficient to provide an accurate readout of  
84 human age. One of the first epigenetic clocks was developed by Hannum using just 71 CpG sites to  
85 estimate age from blood samples (Hannum et al. 2013), while Horvath's multi-tissue age estimator  
86 (Horvath 2013) and Skin and Blood clock (Horvath et al. 2018) use 353 and 391 CpG sites,  
87 respectively (Field et al. 2018; Horvath and Raj 2018). Even a single CpG site in the ELOVL2 gene  
88 is sufficient to determine age (Garagnani et al. 2012), albeit clocks using only a few CpG sites are  
89 less accurate and less applicable to different tissues (Horvath and Raj 2018). The epigenetic clocks  
90 measure the ageing process inherent to all our cells and tissues, irrespective of their proliferation  
91 rate (Horvath et al. 2019). As the human epigenome reflects physiological changes, epigenetic  
92 clocks cannot only predict chronological age from a human sample but also give an estimate of  
93 biological age as has widely been demonstrated by the associations of epigenetic age with morbidity  
94 and mortality (Marioni et al. 2015; Horvath and Raj 2018). Recently, valuable predictors focussing on  
95 this aspect have been developed: PhenoAge (Levine et al. 2018) and GrimAge (Lu et al. 2019),  
96 which form the best epigenetic morbidity and mortality predictors available to date.

97 DNA methylation also captures information on the approximate number of cell divisions a cell has  
98 been through, as has been shown by epiTOC (Yang et al. 2016), a mitotic-like clock that  
99 approximates stem cell divisions and correlates with cancer risk (Tomasetti et al. 2017), and MiAge,  
100 which also measures mitotic age (Youn and Wang 2018). The biology underlying CpG methylation  
101 alterations at the sites linked to ageing clocks is not well understood. The exception is ribosomal  
102 clock based on CpG methylation in ribosomal RNA (rRNA), which is highly conserved throughout  
103 evolution and which forms nucleolus that has itself been implicated in ageing (Tiku and Antebi 2018;  
104 Wang and Lemos 2019). Horvath suggests an interesting hypothesis that epigenetic maintenance  
105 programmes are being reflected in DNA methylation alterations (Horvath 2013; Horvath and Raj  
106 2018; Raj and Horvath 2020). Recent findings implicate loss of H3K36 histone methyltransferase  
107 NSD1 in epigenetic ageing clock acceleration (Martin-Herranz et al. 2019). Despite the enigma  
108 regarding the mechanism of epigenetic clocks, they are reliable predictors of age and extremely  
109 useful biomarkers (Field et al. 2018; Horvath and Raj 2018; Bell et al. 2019). However, little is known  
110 so far about the performance of these clocks in *in vitro* ageing experiments. It has recently been  
111 shown that the rate of epigenetic ageing in cultured cells is significantly faster than in the human  
112 body (Horvath et al. 2019; Sturm et al. 2019) and that epigenetic age is retarded by rapamycin *in*  
113 *vitro* (Horvath et al. 2019), but neither of the clocks specialised for *in vitro* drug discovery nor were  
114 they tested on multiple anti-ageing drugs.

115 Therefore, we aimed to exploit the exceptional accuracy of CpG methylation clocks to uncover new  
116 anti-ageing pharmacological treatments. The current gold standard for discovering novel anti-ageing  
117 drugs are longevity experiments, which are laborious, lengthy and expensive. For instance, in mice,  
118 they take three years, thereby precluding any large scale drug screens. Existing screens in *C.*  
119 *elegans* commonly use live *E. coli* as food (Lucanic et al. 2013; Ye et al. 2014), which is a

120 disadvantage as drugs are metabolised first by the bacteria making their effect on worms secondary,  
121 which may lead to confounded results (Cabreiro et al. 2013; Pryor et al. 2019). Yeast drug screens  
122 lack the crucial aspect of tissue toxicity (Zimmermann et al. 2018). In addition, all longevity assays  
123 require constant supply of the drug, making them highly expensive. Other attempts to uncover anti-  
124 ageing effects of drugs are based on computational analysis using existing transcriptomic  
125 information on the ageing process combined with drug characteristics (Donertas et al. 2018).  
126 However, transcriptomic changes are more transient and noisy when compared to DNA methylation  
127 and are, therefore, a less consistent ageing marker (Horvath and Raj 2018).

128 We tested if existing epigenetic clocks could be used to measure anti-ageing drug potential in human  
129 primary cells *in vitro* and if we could build a new clock specialised for this purpose. Senescence is  
130 tightly associated with ageing of the organism, and because of the pronounced resemblance of  
131 ageing in primary cells *in vitro* to ageing *in vivo*, together with the evidence that human DNA  
132 methylation signatures are conserved and accelerated in cultured fibroblasts (Sturm et al. 2019), we  
133 used cultured human cells as a proxy for human ageing (Lowe et al. 2015; Horvath et al. 2019). The  
134 ability to test anti-ageing drug properties directly on human cells *in vitro* could considerably  
135 accelerate the discovery of new compounds promoting healthy ageing. To this end, we used normal  
136 human mammary fibroblasts (HMFs) from a healthy 16-year old donor that we cultured from  
137 passage 10 to passage 20, which is before these cells reach senescence at passage 29  
138 (Supplemental Fig. S1A-D). To measure CpG methylation, we used EPIC Arrays (Illumina) that  
139 measure methylation at 850,000 sites.

140 First, we tested the three most suitable existing epigenetic clocks, to determine if they could detect  
141 weekly and monthly ageing differences occurring during serial passaging of HMFs (Fig. 1A). The  
142 Multi-tissue clock (Horvath 2013) consistently predicted a higher epigenetic age, and at passage ten  
143 this was  $43.6 \pm 1.0$  years (Fig. 1A), consistent with what was recently reported (Sturm et al. 2019).  
144 This increased age estimate, compared to the age of the donor who was 16 years old, is in  
145 accordance with published data demonstrating that this epigenetic clock overestimates the age of  
146 mammary tissue samples (Horvath 2013). The PhenoAge clock (Levine et al. 2018), developed to  
147 predict mortality and morbidity risks, reported the epigenetic age of the donor to be  $3.5 \pm 1.1$  years  
148 (Fig. 1A). The most accurate age estimate, predicting the age of the donor at  $23.2 \pm 0.87$  years, was  
149 obtained using the Skin and Blood clock, which is specialised for determining donor age of easily  
150 accessible human tissues and cells in culture (Fig. 1A). The Multi-tissue clock and Skin and Blood  
151 clock showed a small increase in age with progressive passaging (from passage 10 to 20, age  
152 estimate increased from  $43.6 \pm 1.0$  to  $53.9 \pm 1.7$  and from  $23.2 \pm 0.87$  to  $31.6 \pm 1.2$  years, respectively),  
153 while this increase was greater for the PhenoAge clock (from  $3.5 \pm 1.1$  to  $26.6 \pm 9.7$  years). This  
154 suggested that, of the tested clocks, the PhenoAge clock captures ageing *in vitro* best (Fig. 1A).  
155 However, the PhenoAge clock showed substantial variability in predictions for higher passages,  
156 which would obstruct the detection of subtle ageing differences upon anti-ageing drug treatments. In

157 conclusion, while the Skin and Blood clock (Horvath et al. 2018) measures fibroblast ageing in  
158 culture, none of the existing clocks was ideally suited to accurately measure subtle anti-ageing drug  
159 potential in human primary cells *in vitro*, and similar comparisons have recently been reported by  
160 others (Horvath et al. 2019; Sturm et al. 2019).

161 This prompted us to develop a new clock that, rather than predicting donor age in years, specialises  
162 in measuring methylation changes occurring during ageing of primary cells in culture and could  
163 differentiate DNA methylation state between each passage. To this end, we developed a clock using  
164 two different cell types, the above-mentioned HMFs and human dermal fibroblasts (HDFs), which  
165 were obtained from a different donor, have a different proliferative lifespan *in vitro*, and a different  
166 rate of DNA methylation change. Like the HMFs, the HDFs were serially passaged and sampled  
167 every other passage for DNA methylation analysis.

168 We used a total of 39 HMF and HDF samples to build the clock (see Materials and methods). To  
169 preselect informative probes, we performed a statistical test to identify CpGs undergoing DNA  
170 methylation changes with increasing cell passage using linear regression (Supplemental Fig. S2A).  
171 The resulting 2,543 CpGs were used to build the clock model by elastic net regression, similar to the  
172 method used by Horvath (Horvath 2013). The model selected 42 predictor CpGs (“clock CpGs”),  
173 shown in Fig. 1B and Supplemental Fig. S2B. Of these CpGs, 23 undergo hypomethylation and 19  
174 become hypermethylated with increasing cell passage (Fig. 1B and Supplemental Fig. S2B). Sixteen  
175 of the CpGs are located in intergenic regions (IGRs), whereas 14 of them are located in gene bodies  
176 and 12 in promoters, respectively (Supplemental Fig. S2C). Interestingly, two of the clock CpGs map  
177 to gene *GRID1*, one is located in its 3’UTR and one in the gene’s body. *GRID1* encodes a subunit of  
178 glutamate receptor channels. Several other clock CpGs are also located in genes implicated in cell  
179 receptor activity and metabolic processes, such as *LDLRAD4* and *NPSR1*. Furthermore, multiple  
180 clock CpGs map to genes that play roles development as well as in the regulation of transcription  
181 and protein binding. Examples include *GGN*, *MEIS2*, *NF1*, *PROP1*, *RFX4*, *RUNX3* and *SMARCA2*.  
182 The 42 CpGs together with their detailed genomic and functional annotation are available in Table 1.

183 After building our novel epigenetic clock to measure cell ageing *in vitro*, named CellAgeClock, we  
184 tested its performance using an entirely different set of samples (n=26), consisting of 22 HMF and  
185 four HDF samples. We observed accurate prediction of passage number for both HMFs and HDFs,  
186 with a Root Mean Square Error (RMSE) of 0.37 (Fig. 1C). To compare the performance of the  
187 CellAgeClock with other epigenetic age predictors, we calculated Spearman’s rank correlation  
188 coefficients between the clocks’ output and actual cell passage (see Table 2). The CellAgeClock  
189 showed the best correlation among the tested predictors, with Spearman’s  $Rho=0.98$  and  $p<2.2e-$   
190  $16$ . We also tested the mitotic-like clocks EpiTOC and MiAge, for comparison. However, their  
191 correlation coefficients were negative, small and non-significant ( $Rho>-0.3$ ,  $p>0.05$ ).

192

193 Having built a precise epigenetic clock that measures methylation changes during replicative ageing  
194 of human primary cells *in vitro*, we tested if anti-ageing drug treatment of HMFs and HDFs  
195 decelerated the CellAgeClock. We chose an mTOR inhibitor, rapamycin, which is one of the most  
196 robust and evolutionarily conserved anti-ageing drug targets (Saxton and Sabatini 2017), and which  
197 mediates its effect through down-regulation of S6K and Pol III, and up-regulation of autophagy  
198 (Bjedov et al. 2010; Filer et al. 2017). We chose relatively low rapamycin concentration of 5nM that  
199 did not inhibit cell growth (Supplemental Fig. S1A) but moderately downregulated mTOR signalling,  
200 as evidenced by decreased pS6K and p4E-BP phosphorylation (Supplemental Fig. S3). This setup  
201 mimics the pro-longevity effects of rapamycin *in vivo* where it is well accepted that only mild nutrient  
202 sensing pathway inhibition increases life- and healthspan (Bjedov and Partridge 2011; Lopez-Otin et  
203 al. 2013).

204 DNA methylation profiles from HDF and HMFs collected following four, six and eight weeks of  
205 rapamycin treatment (passage 16, 18 and 20; Fig. 2) were analysed using the CellAgeClock and  
206 clearly demonstrated that rapamycin slows down methylation changes associated with replicative  
207 ageing. Interestingly, this clock deceleration was more pronounced upon longer treatment as shown  
208 by the gradual decrease of predicted-actual passage from 16 to 20 weeks. The low dose rapamycin  
209 treatment did not affect population doublings, confirming that the methylation changes were not a  
210 reflection of proliferation inhibition or slowing of the cell cycle (Supplemental Fig. S1). This is further  
211 evidenced by comparing the predicted passage from the CellAgeClock against cumulative  
212 population doubling, showing that rapamycin samples lie on a separate line to that of the control  
213 samples (Supplemental Fig. S4A-B). Contrarily, rapamycin samples and controls differed to  
214 considerably lesser extent when actual passage and cumulative population doublings are compared  
215 (Supplemental Fig. S4A-B). We observed a similar pattern for HMFs and HDFs (Fig. 2), suggesting  
216 that the CellAgeClock is applicable to different cells, albeit calibration is required for cells that reach  
217 senescence at different rates.

218 We then focused on HMFs to test another anti-ageing drug, trametinib (Slack et al. 2015), an  
219 inhibitor of the MEK/ERK signalling pathway, which we also applied in low concentration to avoid  
220 any effect on growth and population doubling (Supplemental Fig. S1B and S3). The CellAgeClock  
221 analysis of trametinib treatment showed clock deceleration for all three passages tested (Fig. 2),  
222 thereby confirming previous results in *Drosophila in vivo* that trametinib extends lifespan (Slack et al.  
223 2015). Next, we examined the effect of two other inhibitors of nutrient-sensing pathways as  
224 mutations in these pathways in model organisms represent the most evolutionary conserved anti-  
225 ageing interventions (Lopez-Otin et al. 2013). We tested Dactolisib/BEZ235, a dual ATP competitive  
226 PI3K and mTOR inhibitor, for which we again optimised the dose of the treatment to obtain a  
227 reduction in signalling, as shown by pS6K downstream target 4E-BP (Supplemental Fig. S3), without  
228 significant proliferation impairment (Supplemental Fig. S1C). Dactolisib/BEZ235 slowed down the  
229 DNA methylation changes similar to rapamycin, suggesting that Dactolisib/BEZ235 could be a new

230 anti-ageing drug according to the output of the CellAgeClock (Fig. 2). We also tested torin2, which is  
231 a selective inhibitor of the mTOR pathway that inhibits both mTORC1 and mTORC2, unlike  
232 rapamycin, which targets solely mTORC1. Owing to its more complete inhibition of the mTOR  
233 pathway, we were interested in examining its effect on replicative ageing, especially as the role of  
234 mTORC2 in ageing is less well established. The impact of mTORC2 inhibition on lifespan can be  
235 positive or negative depending on which of the mTORC2 downstream effectors is affected, in which  
236 tissue, and whether females or male mice are used for the experiment (Kennedy and Lamming  
237 2016). Some of the negative effects of mTOR pathway inhibition, such as insulin resistance and  
238 hyperlipidemia, are attributed to the mTORC2 branch of the pathway and may arise under certain  
239 conditions of prolonged and/or high dose rapamycin treatment (Kennedy and Lamming 2016).  
240 Interestingly, while our CellAgeClock suggests that torin2 is indeed a novel anti-ageing drug (Fig. 2,  
241 Supplemental Fig. S1D and S3), its effect on ageing in mammalian cell culture appears to be less  
242 pronounced than that of rapamycin. This is in line with literature suggesting that a promising strategy  
243 to improve healthy ageing is the development of inhibitors that are highly specific for mTORC1 or  
244 that target mTORC1 downstream effectors separately (Kennedy and Lamming 2016).

245 Next, we compared our anti-ageing drug screening results obtained by the CellAgeClock with  
246 analyses using Horvath's Multi-tissue and Skin and Blood clock, as well as the PhenoAge clock. The  
247 clocks did not detect any significant effect of anti-ageing drug treatment (Supplemental Fig. S5). The  
248 Skin and Blood clock<sup>26</sup> was used recently to measure deceleration of ageing in primary fibroblasts  
249 (Horvath et al. 2019; Sturm et al. 2019), however the concentration of rapamycin used in our  
250 conditions was five times lower without effect on cell growth, highlighting the sensitivity of our  
251 epigenetic clock to detect age-related methylation changes at very low drug concentrations. Under  
252 our conditions, the only epigenetic clock that detected gradual methylation changes from passage 10  
253 to passage 20 was the PhenoAge clock (Supplemental Fig. S5). However, its output was more  
254 variable between samples and inconsistent for anti-ageing drug treatments, reporting both clock  
255 acceleration and deceleration. For instance, rapamycin, Dactolisib/BEZ235 and torin2 treated cells  
256 appeared slightly younger compared to controls, whereas trametinib treated cells were estimated  
257 older to some extent (Supplemental Fig. S5), unlike the results we obtained with our CellAgeClock  
258 (Fig. 2). Overall, the CellAgeClock that we developed here was more consistent and performed  
259 significantly better on ageing cells in culture and following known anti-ageing drug treatments  
260 compared to existing clocks. Our results are supportive of clocks being highly specialised for a  
261 certain task, and suggests that while other popular epigenetic clocks perform remarkably on  
262 determining donor's age in years and their health status, they were not able to robustly detect slight  
263 ageing changes in human primary cells induced by drug treatment over a short period of time *in*  
264 *vitro*.

265 Next, we assessed if the CellAgeClock is suitable for the screening of novel anti-ageing drugs. To  
266 this aim, we examined if drugs that decelerate the CellAgeClock also reduce features associated

267 with senescence, such as morphological changes and expression of ageing biomarkers  
268 (Hanzelmann et al. 2015). Rapamycin, Dactolisib/BEZ235 and Trametinib treatment slowed down  
269 morphological alteration in cells that gradually occur during replicative ageing, namely cell  
270 elongation, increased nuclear area and cell area, and the treated cells appeared particularly  
271 'youthful' (Fig. 3). Another characteristic of senescence is increased expression of the cyclin-  
272 dependent kinase inhibitors p21<sup>CIP1/Waf1</sup> and p16<sup>INK4a</sup>. p21<sup>CIP1/Waf1</sup> triggers G1 cycle arrest upon  
273 damage and can lead to senescence or apoptosis (He and Sharpless 2017; McHugh and Gil 2018).  
274 Expression of p16<sup>INK4a</sup>, which is produced from the CDKN2A gene together with p19<sup>ARF</sup> (p14<sup>ARF</sup> in  
275 humans) increases exponentially during ageing and was suggested to stabilise the senescent state  
276 (Gire and Dulic 2015). p16<sup>INK4a</sup> expression was the marker of choice for senescent cell clearance  
277 leading to prolonged lifespan in mice (Baker et al. 2016).

278 Our results demonstrate that drugs which decelerate the CellAgeClock at the same time reduce  
279 expression of both nuclear p21<sup>CIP1/Waf1</sup> and p16<sup>INK4a</sup> compared to non-treated cells, showing their  
280 efficacy in delaying the senescence programme (Fig. 3B-C). In addition, the most frequently used  
281 senescent marker, senescent-associated  $\beta$ -galactosidase activity (SA- $\beta$ gal), was significantly  
282 decreased upon anti-ageing drugs treatment with rapamycin and Dactolisib/BEZ235, but not in cells  
283 treated with trametinib (Fig. 3B-C). Another difference in senescent markers was observed with  
284 interleukin-6 (IL-6), which is one of the most important inflammatory cytokines and part of the  
285 senescent-associated secretory phenotype. IL-6 was significantly reduced in aged cells upon  
286 rapamycin and Dactolisib/BEZ235 treatment but not in trametinib treated cells (Fig. 3B-C). This  
287 difference possibly stems from the overactivated RAS/ERK pathway being a more prominent inducer  
288 of senescence than the overactivated mTOR/PI3K pathway (Kennedy et al. 2011), and hence  
289 corresponding inhibitors have different potency in inhibiting senescence. Finally, we examined the  
290 nucleolus, an organelle dedicated to rRNA production and ribosomal assembly, as it has recently  
291 emerged that maintenance of its structure, and low levels of nucleolar methyltransferase fibrillarin, is  
292 a common denominator for major anti-ageing intervention from worms to mice (Tiku and Antebi  
293 2018). We observed that as a consequence of ageing, nucleoli in aged HMFs lose their defined  
294 round shape, are more diffused, and stain less well. For rapamycin and Dactolisib/BEZ235, we  
295 observed clearly defined and 'younger' looking nucleoli in aged cells. However, trametinib treated  
296 cells resembled the nucleoli of controls. In summary, a panel of the most frequently used markers for  
297 cell senescence confirmed that drugs which decelerate the CellAgeClock also make the cells appear  
298 more youthful. This strongly suggests that the CellAgeClock can be used as a robust and sensitive  
299 detector of novel anti-ageing treatments.

300 Finally, having discovered two novel potential anti-ageing drug treatments using the CellAgeClock,  
301 Dactolisib/BEZ235 and torin2, we tested and validated them *in vivo* using the fruit fly *Drosophila*  
302 *melanogaster* as a model organism. This is important as tissue-specific drug toxicity, which can be  
303 missed in cell culture, is one of the major reasons for drug failure in clinical trials. For *in vivo*



304 longevity studies we used the outbred wild-type  $w^{Dah}$  strain which is particularly suitable for ageing  
305 studies, Drosophilper device for fast fly transfer, and specially formulated holidic medium (Piper et al.  
306 2014) to increase drug bioavailability compared to standard sugar-yeast-agar fly food. We used  
307 rapamycin as a positive control for longevity experiments in flies and showed that median lifespan  
308 extension on holidic media varied from 7% to 9% compared to ethanol solvent control, depending on  
309  $1\mu\text{M}$  or  $5\mu\text{M}$  concentration, respectively ( $p < 0.001$ , log-rank test), which is comparable to published  
310 literature (Fan et al. 2015) (Fig. 4A). Importantly, both Dactolisib/BEZ235 and torin2 significantly  
311 extended lifespan in *Drosophila* for 7% ( $p < 0.001$ , log-rank test) (Fig. 4B-C). This firmly demonstrates  
312 that drugs that decelerate the CellAgeClock have similarly favourable output on major anti-ageing  
313 biomarkers *in vitro* and extend longevity *in vivo* (Fig. 4D).

314 For the first time, we have a robust epigenetic clock for the rapid discovery of anti-ageing drugs  
315 directly in human cells, bypassing lower model organisms and significantly shortening discovery time  
316 compared to 3-year long mice longevity analysis. Testing different compounds for ageing using the  
317 CellAgeClock could potentially reveal new anti-ageing pathways and help us to improve our  
318 knowledge base of not only ageing biology but of molecular pathways underpinning the epigenetic  
319 clocks as well, understanding of which is limited. Other available epigenetic clocks could not  
320 accurately detect the effect of low-dose short-term anti-ageing drugs on cells *in vitro*. We expect  
321 many biological outputs to be extracted by the CellAgeClock and other epigenetic clock algorithms in  
322 the future, given the wealth of information stored in our epigenome.

323  
324 Better experimental systems to test anti-ageing drugs are very much needed, given a rising  
325 proportion of the elderly in modern societies and, as a consequence, larger numbers of people  
326 suffering from age-related diseases. Our results show that by using the CellAgeClock, cultured  
327 primary human cells can be used as a proxy to measure human ageing and can reliably detect anti-  
328 ageing effects upon a relatively brief treatment. By doing so, this fast and accurate method is  
329 expected to accelerate the discovery of novel preventive treatments for age-related disease, directly  
330 using human cells. Importantly, follow-up research will be focused on expanding our findings on  
331 different types of primary cells from donors of different ages, as well as on testing further  
332 compounds. While ageing itself is not a disease, potential anti-ageing drugs could be FDA approved  
333 separately for different conditions. The first study to test broad-spectrum protection capacity of  
334 metformin, the TAME study, is underway (Barzilai et al. 2016). In addition, it was shown that  
335 rapamycin/everolimus pre-treatment dramatically improves flu vaccination and immune response in  
336 the elderly (Mannick et al. 2018). In mice, it also lowers the incidence of tumours (Anisimov et al.  
337 2011), and it shows promising results in the field of neurodegeneration (Bove et al. 2011). This  
338 supports the idea that targeting healthy ageing might have multiple beneficial outputs.

339  
340 Our novel drug discovery platform will inform on new anti-ageing mechanisms, currently dominated  
341 by IIS and mTOR signalling pathways as well as dietary restriction regimes. Many drugs targeting

342 growth pathways are already available from cancer research where they are used in very high  
343 doses. With the CellAgeClock, we examined which of these compounds could be disease  
344 preventative at very low concentrations. Our experimental setup is also suitable for nutraceutical  
345 approaches whereby dietary supplements can be rigorously tested for their effect on ageing. Overall,  
346 we expect our novel discovery platform to accelerate the discovery of strongly sought after anti-  
347 ageing drugs and geroprotective strategies to improve healthy human ageing.

348

## 349 **Materials and methods**

350 **Cell culture and reagents.** Normal finite lifespan human mammary fibroblasts (HMFs) were  
351 obtained from reduction mammoplasty tissue of a 16-year-old individual, donor 48 by Dr Martha  
352 Stampfer (University Berkeley) who has all required IRB approvals to distribute these cell samples  
353 and MTA agreement set in place with Dr Cleo Bishop laboratory. Independent cultures from these  
354 cells were serially passaged from passage 9 through to passage 20 and aliquots taken upon each  
355 passage for Illumina Infinium Methylation EPIC analysis. HMFs were maintained in Dulbecco's  
356 Modified Eagles Medium (DMEM) (Life Technologies, UK) supplemented with 10% foetal bovine  
357 serum (FBS) (Labtech.com, UK), 2mM L-glutamine (Life Technologies, UK) and 10 µg/mL insulin  
358 from bovine pancreas (Sigma).

359 Normal finite lifespan human dermal fibroblasts (HDFs) were obtained from face lift dermis following  
360 a kind donation from an anonymous healthy patient under standard ethical practice, reference LREC  
361 No. 09/HO704/69. HDFs were grown in DMEM with 4 mM L-glutamine (Life Technologies),  
362 supplemented with 10% FBS.

363 Cells were plated at 7,500 cells/cm<sup>2</sup> in T25 cell culture flask in 5ml of media to which 5µl of  
364 appropriate drug or vehicle control was added. Media was changed every two days and cells were  
365 passaged every 7 days and trypsinisation was used to detach the cells. All cells were routinely  
366 tested for mycoplasma and shown to be negative.

367

368 **Immunofluorescence microscopy and high content analysis.** Cells were washed in phosphate  
369 buffered saline (PBS), fixed for 15 minutes with 3.7% paraformaldehyde with 5% sucrose, washed  
370 and permeabilised for 15 minutes using 0.1% Triton X in PBS (30 minutes for anti-nucleolin  
371 antibody) then washed and blocked in 0.25% bovine serum albumin (BSA) in PBS before primary  
372 antibody incubations. Primary antibodies used were anti-IL6 (R&D Systems, 1:100; overnight 4°C),  
373 anti-nucleolin (Santa Cruz, 1:2000, overnight room temperature), anti-p16 (Proteintech, 1:500,  
374 overnight 4°C), anti-p21 (12D1, Cell Signalling, 1:2000, overnight 4°C). Cells were incubated for 2  
375 hours at room temperature with the appropriate AlexaFluor-488, AlexaFluor-546 or AlexaFluor-647  
376 conjugated antibody (1:500, Invitrogen), DAPI (1:1,000 from 1mg/mL stock) and CellMask Orange or  
377 Deep Red (1:200,000, Invitrogen). Images were acquired using the IN Cell 2200 or 6000 automated  
378 microscope (GE) and HCA was performed using the IN Cell Developer software (GE).

379

380 **Z score generation.** For each of the parameters analysed, significance was defined as one Z score  
381 from the negative control mean. Z scores were generated according to the formula below:  $Z \text{ score} =$   
382  $(\text{mean value of experimental condition} - \text{mean value of vehicle control}) / \text{standard deviation (SD)}$  for  
383 vehicle control.

384  
385 **Senescence-associated beta-galactosidase (SA- $\beta$ -Gal) assay.** Cells were washed in PBS, fixed  
386 for 5 minutes with 0.2% glutaraldehyde, washed and incubated for 24 hour at 37°C (no CO<sub>2</sub>) with  
387 fresh senescence-associated beta-galactosidase (SA- $\beta$ -Gal) solution: 1mg of 5-bromo-4-chloro-3-  
388 indoyl  $\beta$ -D-galactosidase (X-Gal) per mL (stock = 20mg of dimethylsulfoxide per ml) / 40mM citric  
389 acid/sodium phosphate, pH 6.0 / 5mM potassium ferrocyanide / 5mM potassium ferricyanide /  
390 150mM NaCl / 2mM MgCl<sub>2</sub>). Cells were stained with Hoechst 33342 (1:10,000 from 10mg/mL stock)  
391 for 30 minutes. Images were acquired using the IN Cell 2200 automated microscope and HCA was  
392 performed using the IN Cell Developer software.

393  
394 **Genomic DNA extraction.** For isolation of Genomic DNA from primary human fibroblasts we used  
395 QIAamp DNA micro kit (56304) and we followed manufacturers protocol, with an additional washing  
396 steps with 500 $\mu$ l AW2 buffer and 500 $\mu$ l 80% ethanol to improve purity. DNA quantification and purity  
397 was determined by Nanodrop and QuBit. For bisulfite conversion EZ DNA methylation kit was used  
398 (D5001).

399  
400 **Preparation of methylation array data.** For each sample, 500ng high-quality DNA was bisulphite  
401 converted using the EZ DNA methylation kit (Zymo Research), using the alternative incubation  
402 conditions recommended for use with Illumina methylation arrays. Bisulphite converted DNA was  
403 eluted in 12 $\mu$ l elution buffer. Methylation was analysed using the Infinium Human Methylation EPIC  
404 array (Illumina) using standard operating procedures at the UCL Genomics facility. The EPIC array  
405 data have been deposited into ArrayExpress at the European Bioinformatics Institute  
406 (<https://www.ebi.ac.uk/arrayexpress/>) under accession number E-MTAB-8327.

407  
408  
409 **Pre-processing of methylation array data.** DNA methylation array data was processed using the  
410 minfi package (Fortin et al. 2017) within R (R Core Team, 2013). Initial QC metrics from this package  
411 were used to remove low-quality samples. Probes were filtered using a detection p-value cut-off  
412  $>0.01$  and normalised using the Noob procedure. Cross-hybridising probes were removed from  
413 analysis based on the list published in McCartney et al. (McCartney et al. 2016). The training and  
414 test sets were pre-processed separately to obtain a fair estimate of the performance of the  
415 CellAgeClock.

416  
417 **Estimation of sample age using existing epigenetic clocks.** Following pre-processing of data,  
418 the epigenetic age of all samples was predicted using three epigenetic clocks; the Multi-tissue clock

419 (Horvath 2013), the Skin and Blood clock (Horvath et al. 2018) and the PhenoAge clock (Levine et  
420 al. 2018) using the online DNA methylation calculator at <http://dnamage.genetics.ucla.edu> (Horvath  
421 2013).

422

423 **Development of the CellAgeClock.** The clock was built using a total of 39 samples, with six  
424 samples at each of the following passages; 10, 12, and 14; and seven samples at each of the  
425 following passages; 16, 18, and 20. This included both HDFs (n=12) and HMFs (n=27). 730,453  
426 probes passed quality control measurements as described in the pre-processing section. A  
427 differential DNA methylation test was performed on this set of probes to identify CpGs undergoing  
428 significant DNA methylation changes with increasing cell passage. We used the linear regression  
429 approach for continuous variables implemented in minfi's DMPFinder function (Fortin et al. 2017).  
430 This resulted in 2,543 differentially methylated CpGs at a p-value threshold of  $1 \times 10^{-11}$  which was  
431 selected using leave one out validation. Next, we built the clock model by elastic net regression  
432 using the DNA methylation levels of the 2,543 CpGs across all passages as input. We applied the  
433 glmnet function of the corresponding R package (Friedman et al. 2010) setting alpha to 0.5 and  
434 determining the lambda parameter by the internal cross validation function provided by glmnet. The  
435 elastic net regression model selected 42 CpGs as predictors of cell passage (Supplemental Table 1).  
436 We obtained the genomic annotation of these CpGs from Illumina's EPIC manifest, and retrieved  
437 gene functions using DAVID (Huang da et al. 2009) where we selected the following sources for  
438 annotation: GOTERM\_BP\_DIRECT, GOTERM\_CC\_DIRECT, GOTERM\_MF\_DIRECT,  
439 ENTREZ\_GENE\_SUMMARY, OFFICIAL\_GENE\_SYMBOL and KEGG\_PATHWAY.

440 We then tested the CellAgeClock on a different set of 26 samples, 22 HMFs and 4 HDFs, across the  
441 following passages: 9 (1 HMFs), 10 (2 HMFs), 11 (2 HMFs), 12 (1 HMFs), 13 (2 HMFs), 14  
442 (2 HMFs), 15 (2 HMFs), 16 (4 HMFs and 2 HDFs), 18 (3 HMFs and 1 HDFs) and 20 (3 HMFs and  
443 1 HDFs).

444

445 **Availability of the CellAgeClock.** The CellAgeClock is available as a Jupyter Notebook in Python  
446 and can be retrieved from <https://github.com/ucl-medical-genomics/CellAge-epigenetic-clock>.

447

448 **Lifespan measurements.** We used *white Dahomey* ( $w^{Dah}$ ) wild-type flies that were maintained and  
449 all experiments were conducted at 25°C. Flies were kept on a 12 h light:12 h dark cycle at constant  
450 humidity using standard sugar/yeast/agar (SYA) medium. For all experiments, flies were reared at  
451 standard larval density by transferring 18  $\mu$ l of egg suspension into SYA bottles. Eclosing adults  
452 were collected over a 12-h period and allowed to mate for 48 h before sorting into single sexes and  
453 placed in vials containing either control or experimental drug food. For lifespan assays, flies were  
454 reared at standard density and maintained at 15 flies per vial and we used holidic media recipe food  
455 for all longevity assays (Piper et al. 2014). Flies were transferred to fresh food vials every 2-3 days  
456 and scored for deaths. At least 150 flies were used for each lifespan experiment.

457

458 **Western blot measurements.** Whole flies or human primary cell pellet was homogenised in 2x  
459 Laemmli loading sample buffer (100 mM Tris pH 6.8, 20% glycerol, 4% SDS; Bio-Rad) containing 50  
460 mM DTT, protease inhibitor (cOmplete Mini EDTA-free; Roche) and phosphatase inhibitor  
461 (PhosSTOP EASYpack; Roche) cocktails. Extracts were cleared by centrifugation and approximately  
462 20 µg of protein extract was loaded per lane on a polyacrylamide gel. Proteins were separated and  
463 transferred to nitrocellulose membrane. The following antibodies were used at the indicated dilutions:  
464 H3 (Cell Signaling Technology; 1:2000; 4499S), pS6K (Cell Signaling Technology; 1:1000; 9206S),  
465 total S6K (Santa Cruz; 1:1000; 8418), p4EBP (Cell Signalling Technology, 1:500; 2855S), non-  
466 phospho4E-BP (Cell Signalling Technology; 1:500; 4923S), pAkt (Cell Signalling; 1:1000; 4060),  
467 pAkt (Cell Signalling; 1:1000; 4056), total Akt (Cell Signalling; 1:1000; 9272), pERK (Cell Signalling;  
468 1:1000; 4370), total (Cell Signalling; 1:1000; 4692). Blots were developed using the ECL detection  
469 system (GE, Amersham), and analysed using FIJI software (US National Institutes of Health). We  
470 used precasted TGX stain-free gels from Bio-Rad (567-8123 or 567-8124) according to the  
471 manufacturer's instructions.

472

473 **Statistical analysis.** Statistical analysis was performed using R. Log-rank tests were performed on  
474 lifespan curves.

#### 475 **Online content**

476 The CellAgeClock is available from GitHub at [https://github.com/ucl-medical-genomics/CellAge-](https://github.com/ucl-medical-genomics/CellAge-epigenetic-clock)  
477 [epigenetic-clock](https://github.com/ucl-medical-genomics/CellAge-epigenetic-clock). All methylation microarray data reported in this study have been deposited in the  
478 ArrayExpress (<https://www.ebi.ac.uk/arrayexpress/>) public repository and are accessible under  
479 accession number E-MTAB-8327.

480

#### 481 **References**

482

483 Anisimov VN, Zabezhinski MA, Popovich IG, Piskunova TS, Semenchenko AV, Tyndyk ML,  
484 Yurova MN, Rosenfeld SV, Blagosklonny MV. 2011. Rapamycin increases lifespan  
485 and inhibits spontaneous tumorigenesis in inbred female mice. *Cell Cycle* **10**: 4230-  
486 4236.

487 Baker DJ, Childs BG, Durik M, Wijers ME, Sieben CJ, Zhong J, Saltness RA, Jeganathan KB,  
488 Verzosa GC, Pezeshki A et al. 2016. Naturally occurring p16(Ink4a)-positive cells  
489 shorten healthy lifespan. *Nature* **530**: 184-189.

490 Barzilai N, Crandall JP, Kritchevsky SB, Espeland MA. 2016. Metformin as a Tool to Target  
491 Aging. *Cell Metab* **23**: 1060-1065.

492 Bell CG, Lowe R, Adams PD, Baccarelli AA, Beck S, Bell JT, Christensen BC, Gladyshev VN,  
493 Heijmans BT, Horvath S et al. 2019. DNA methylation aging clocks: challenges and  
494 recommendations. *Genome Biol* **20**: 249.

495 Bjedov I, Partridge L. 2011. A longer and healthier life with TOR down-regulation: genetics  
496 and drugs. *Biochem Soc Trans* **39**: 460-465.

- 497 Bjedov I, Toivonen JM, Kerr F, Slack C, Jacobson J, Foley A, Partridge L. 2010. Mechanisms  
498 of life span extension by rapamycin in the fruit fly *Drosophila melanogaster*. *Cell*  
499 *Metab* **11**: 35-46.
- 500 Booth LN, Brunet A. 2016. The Aging Epigenome. *Mol Cell* **62**: 728-744.
- 501 Bove J, Martinez-Vicente M, Vila M. 2011. Fighting neurodegeneration with rapamycin:  
502 mechanistic insights. *Nat Rev Neurosci* **12**: 437-452.
- 503 Cabreiro F, Au C, Leung KY, Vergara-Irigaray N, Cocheme HM, Noori T, Weinkove D,  
504 Schuster E, Greene ND, Gems D. 2013. Metformin retards aging in *C. elegans* by  
505 altering microbial folate and methionine metabolism. *Cell* **153**: 228-239.
- 506 Castillo-Quan JI, Kinghorn KJ, Bjedov I. 2015. Genetics and pharmacology of longevity: the  
507 road to therapeutics for healthy aging. *Adv Genet* **90**: 1-101.
- 508 Cohen E, Bieschke J, Perciavalle RM, Kelly JW, Dillin A. 2006. Opposing activities protect  
509 against age-onset proteotoxicity. *Science* **313**: 1604-1610.
- 510 Donertas HM, Fuentealba Valenzuela M, Partridge L, Thornton JM. 2018. Gene expression-  
511 based drug repurposing to target aging. *Aging Cell* **17**: e12819.
- 512 Fan X, Liang Q, Lian T, Wu Q, Gaur U, Li D, Yang D, Mao X, Jin Z, Li Y et al. 2015. Rapamycin  
513 preserves gut homeostasis during *Drosophila* aging. *Oncotarget* **6**: 35274-35283.
- 514 Field AE, Robertson NA, Wang T, Havas A, Ideker T, Adams PD. 2018. DNA Methylation  
515 Clocks in Aging: Categories, Causes, and Consequences. *Mol Cell* **71**: 882-895.
- 516 Filer D, Thompson MA, Takhaviev V, Dobson AJ, Kotronaki I, Green JWM, Heinemann M,  
517 Tullet JMA, Alic N. 2017. RNA polymerase III limits longevity downstream of TORC1.  
518 *Nature* **552**: 263-267.
- 519 Fortin JP, Triche TJ, Jr., Hansen KD. 2017. Preprocessing, normalization and integration of  
520 the Illumina HumanMethylationEPIC array with minfi. *Bioinformatics* **33**: 558-560.
- 521 Friedman J, Hastie T, Tibshirani R. 2010. Regularization Paths for Generalized Linear Models  
522 via Coordinate Descent. *J Stat Softw* **33**: 1-22.
- 523 Garagnani P, Bacalini MG, Pirazzini C, Gori D, Giuliani C, Mari D, Di Blasio AM, Gentilini D,  
524 Vitale G, Collino S et al. 2012. Methylation of ELOVL2 gene as a new epigenetic  
525 marker of age. *Aging Cell* **11**: 1132-1134.
- 526 Gire V, Dulic V. 2015. Senescence from G2 arrest, revisited. *Cell Cycle* **14**: 297-304.
- 527 Hannum G, Guinney J, Zhao L, Zhang L, Hughes G, Sada S, Klotzle B, Bibikova M, Fan JB,  
528 Gao Y et al. 2013. Genome-wide methylation profiles reveal quantitative views of  
529 human aging rates. *Mol Cell* **49**: 359-367.
- 530 Hanzelmann S, Beier F, Gusmao EG, Koch CM, Hummel S, Charapitsa I, Jousen S, Benes V,  
531 Brummendorf TH, Reid G et al. 2015. Replicative senescence is associated with  
532 nuclear reorganization and with DNA methylation at specific transcription factor  
533 binding sites. *Clin Epigenetics* **7**: 19.
- 534 Harrison DE, Strong R, Sharp ZD, Nelson JF, Astle CM, Flurkey K, Nadon NL, Wilkinson JE,  
535 Frenkel K, Carter CS et al. 2009. Rapamycin fed late in life extends lifespan in  
536 genetically heterogeneous mice. *Nature* **460**: 392-395.
- 537 He S, Sharpless NE. 2017. Senescence in Health and Disease. *Cell* **169**: 1000-1011.
- 538 Horvath S. 2013. DNA methylation age of human tissues and cell types. *Genome Biol* **14**:  
539 R115.
- 540 Horvath S, Lu AT, Cohen H, Raj K. 2019. Rapamycin retards epigenetic ageing of  
541 keratinocytes independently of its effects on replicative senescence, proliferation  
542 and differentiation. *Aging (Albany NY)* **11**: 3238-3249.

- 543 Horvath S, Oshima J, Martin GM, Lu AT, Quach A, Cohen H, Felton S, Matsuyama M, Lowe  
544 D, Kabacik S et al. 2018. Epigenetic clock for skin and blood cells applied to  
545 Hutchinson Gilford Progeria Syndrome and ex vivo studies. *Aging (Albany NY)* **10**:  
546 1758-1775.
- 547 Horvath S, Raj K. 2018. DNA methylation-based biomarkers and the epigenetic clock theory  
548 of ageing. *Nat Rev Genet* **19**: 371-384.
- 549 Huang da W, Sherman BT, Lempicki RA. 2009. Systematic and integrative analysis of large  
550 gene lists using DAVID bioinformatics resources. *Nat Protoc* **4**: 44-57.
- 551 Kennedy AL, Morton JP, Manoharan I, Nelson DM, Jamieson NB, Pawlikowski JS, McBryan  
552 T, Doyle B, McKay C, Oien KA et al. 2011. Activation of the PIK3CA/AKT pathway  
553 suppresses senescence induced by an activated RAS oncogene to promote  
554 tumorigenesis. *Mol Cell* **42**: 36-49.
- 555 Kennedy BK, Lamming DW. 2016. The Mechanistic Target of Rapamycin: The Grand  
556 ConducTOR of Metabolism and Aging. *Cell Metab* **23**: 990-1003.
- 557 Levine ME, Lu AT, Quach A, Chen BH, Assimes TL, Bandinelli S, Hou L, Baccarelli AA, Stewart  
558 JD, Li Y et al. 2018. An epigenetic biomarker of aging for lifespan and healthspan.  
559 *Aging (Albany NY)* **10**: 573-591.
- 560 Lopez-Otin C, Blasco MA, Partridge L, Serrano M, Kroemer G. 2013. The hallmarks of aging.  
561 *Cell* **153**: 1194-1217.
- 562 Lowe R, Overhoff MG, Ramagopalan SV, Garbe JC, Koh J, Stampfer MR, Beach DH, Rakyen  
563 VK, Bishop CL. 2015. The senescent methylome and its relationship with cancer,  
564 ageing and germline genetic variation in humans. *Genome Biol* **16**: 194.
- 565 Lu AT, Quach A, Wilson JG, Reiner AP, Aviv A, Raj K, Hou L, Baccarelli AA, Li Y, Stewart JD et  
566 al. 2019. DNA methylation GrimAge strongly predicts lifespan and healthspan.  
567 *Aging (Albany NY)* **11**: 303-327.
- 568 Lucanic M, Lithgow GJ, Alavez S. 2013. Pharmacological lifespan extension of invertebrates.  
569 *Ageing Res Rev* **12**: 445-458.
- 570 Mannick JB, Morris M, Hockey HP, Roma G, Beibel M, Kulmatycki K, Watkins M,  
571 Shavlakadze T, Zhou W, Quinn D et al. 2018. TORC1 inhibition enhances immune  
572 function and reduces infections in the elderly. *Sci Transl Med* **10**.
- 573 Marioni RE, Shah S, McRae AF, Chen BH, Colicino E, Harris SE, Gibson J, Henders AK,  
574 Redmond P, Cox SR et al. 2015. DNA methylation age of blood predicts all-cause  
575 mortality in later life. *Genome Biol* **16**: 25.
- 576 Martin-Herranz DE, Aref-Eshghi E, Bonder MJ, Stubbs TM, Choufani S, Weksberg R, Stegle  
577 O, Sadikovic B, Reik W, Thornton JM. 2019. Screening for genes that accelerate the  
578 epigenetic aging clock in humans reveals a role for the H3K36 methyltransferase  
579 NSD1. *Genome Biol* **20**: 146.
- 580 Martin-Montalvo A, Mercken EM, Mitchell SJ, Palacios HH, Mote PL, Scheibye-Knudsen M,  
581 Gomes AP, Ward TM, Minor RK, Blouin MJ et al. 2013. Metformin improves  
582 healthspan and lifespan in mice. *Nat Commun* **4**: 2192.
- 583 McCartney DL, Walker RM, Morris SW, McIntosh AM, Porteous DJ, Evans KL. 2016.  
584 Identification of polymorphic and off-target probe binding sites on the Illumina  
585 Infinium MethylationEPIC BeadChip. *Genom Data* **9**: 22-24.
- 586 McHugh D, Gil J. 2018. Senescence and aging: Causes, consequences, and therapeutic  
587 avenues. *J Cell Biol* **217**: 65-77.
- 588 Niccoli T, Partridge L. 2012. Ageing as a risk factor for disease. *Curr Biol* **22**: R741-752.

- 589 Partridge L, Deelen J, Slagboom PE. 2018. Facing up to the global challenges of ageing.  
590 *Nature* **561**: 45-56.
- 591 Pinkston JM, Garigan D, Hansen M, Kenyon C. 2006. Mutations that increase the life span  
592 of *C. elegans* inhibit tumor growth. *Science* **313**: 971-975.
- 593 Piper MD, Blanc E, Leitao-Goncalves R, Yang M, He X, Linford NJ, Hoddinott MP, Hopfen C,  
594 Soultoukis GA, Niemeyer C et al. 2014. A holidic medium for *Drosophila*  
595 *melanogaster*. *Nat Methods* **11**: 100-105.
- 596 Pryor R, Norvaisas P, Marinos G, Best L, Thingholm LB, Quintaneiro LM, De Haes W, Esser  
597 D, Waschina S, Lujan C et al. 2019. Host-Microbe-Drug-Nutrient Screen Identifies  
598 Bacterial Effectors of Metformin Therapy. *Cell* **178**: 1299-1312 e1229.
- 599 Rae MJ, Butler RN, Campisi J, de Grey AD, Finch CE, Gough M, Martin GM, Vijg J, Perrott  
600 KM, Logan BJ. 2010. The demographic and biomedical case for late-life  
601 interventions in aging. *Sci Transl Med* **2**: 40cm21.
- 602 Raj K, Horvath S. 2020. Current perspectives on the cellular and molecular features of  
603 epigenetic ageing. *Exp Biol Med (Maywood)* doi:10.1177/1535370220918329:  
604 1535370220918329.
- 605 Reeve A, Simcox E, Turnbull D. 2014. Ageing and Parkinson's disease: why is advancing age  
606 the biggest risk factor? *Ageing Res Rev* **14**: 19-30.
- 607 Saxton RA, Sabatini DM. 2017. mTOR Signaling in Growth, Metabolism, and Disease. *Cell*  
608 **168**: 960-976.
- 609 Selman C, Lingard S, Choudhury AI, Batterham RL, Claret M, Clements M, Ramadani F,  
610 Okkenhaug K, Schuster E, Blanc E et al. 2008. Evidence for lifespan extension and  
611 delayed age-related biomarkers in insulin receptor substrate 1 null mice. *Faseb J* **22**:  
612 807-818.
- 613 Slack C, Alic N, Foley A, Cabecinha M, Hoddinott MP, Partridge L. 2015. The Ras-Erk-ETS-  
614 Signaling Pathway Is a Drug Target for Longevity. *Cell* **162**: 72-83.
- 615 Sturm G, Cardenas A, Bind MA, Horvath S, Wang S, Wang Y, Hagg S, Hirano M, Picard M.  
616 2019. Human aging DNA methylation signatures are conserved but accelerated in  
617 cultured fibroblasts. *Epigenetics* doi:10.1080/15592294.2019.1626651: 1-16.
- 618 Tiku V, Antebi A. 2018. Nucleolar Function in Lifespan Regulation. *Trends Cell Biol* **28**: 662-  
619 672.
- 620 Tomasetti C, Li L, Vogelstein B. 2017. Stem cell divisions, somatic mutations, cancer  
621 etiology, and cancer prevention. *Science* **355**: 1330-1334.
- 622 Wang M, Lemos B. 2019. Ribosomal DNA harbors an evolutionarily conserved clock of  
623 biological aging. *Genome Res* **29**: 325-333.
- 624 Wessells RJ, Fitzgerald E, Cypser JR, Tatar M, Bodmer R. 2004. Insulin regulation of heart  
625 function in aging fruit flies. *Nat Genet* **36**: 1275-1281.
- 626 Wilson BE, Jacob S, Yap ML, Ferlay J, Bray F, Barton MB. 2019. Estimates of global  
627 chemotherapy demands and corresponding physician workforce requirements for  
628 2018 and 2040: a population-based study. *Lancet Oncol* **20**: 769-780.
- 629 Yang Z, Wong A, Kuh D, Paul DS, Rakyan VK, Leslie RD, Zheng SC, Widschwendter M, Beck S,  
630 Teschendorff AE. 2016. Correlation of an epigenetic mitotic clock with cancer risk.  
631 *Genome Biol* **17**: 205.
- 632 Ye X, Linton JM, Schork NJ, Buck LB, Petrascheck M. 2014. A pharmacological network for  
633 lifespan extension in *Caenorhabditis elegans*. *Aging Cell* **13**: 206-215.
- 634 Youn A, Wang S. 2018. The MiAge Calculator: a DNA methylation-based mitotic age  
635 calculator of human tissue types. *Epigenetics* **13**: 192-206.



636 Zimmermann A, Hofer S, Pendl T, Kainz K, Madeo F, Carmona-Gutierrez D. 2018. Yeast as a  
637 tool to identify anti-ageing compounds. *FEMS Yeast Res* **18**.

638  
639

640

#### 641 **Acknowledgements**

642 IB acknowledges funding from ERC StG 311331, ERC PoC 842174, Royal Society Research Grant,  
643 The Bill Lyons foundation. SB acknowledges support from the Wellcome Trust  
644 (218274/Z/19/Z). This work was supported in part by the CRUK-UCL Centre Award [C416/A25145]  
645 awarded to IB and SB. EJT has been funded by MRC (MR/K501372/1) and BBSRC (BB/P002579/1)  
646 and DM is funded by the BBSRC (BB/N503629/1). JG, and MS are supported by U.S. Department of  
647 Energy under Contract No. DE-AC02-05CH11231 and the Congressionally Directed Medical  
648 Research Programs Breast Cancer Research Program Era of Hope Scholar Award BC141351.

#### 649 **Authors contribution**

650 SB, IB developed initial concept. SB, IB, RL and CLB finalised concept developing and designed  
651 experiments. RL, SE and APW analysed data. RL developed the CellAgeClock. CLB and EJT  
652 provided cell culture expertise. CL, EJT, ERS, VEMM, DM and IB performed all experiments. SE,  
653 SB, IB, RL, CLB wrote the manuscript. JCG and MRS provided critical reagents. All authors  
654 discussed results and commented on and approved the manuscript.

#### 655 **Competing interest**

656 The authors declare no competing interest.

#### 657 **Additional information**

658 Correspondence and requests for materials should be addressed to IB, CLB, RL and SB.

#### 659 **Figure Legends**

660 **Figure 1.** Development of CellAgeClock for monitoring subtle ageing difference in cells in culture.

661 A) Predicted age of control samples using three existing epigenetic clocks. Predicted epigenetic  
662 age for control samples across all experiments as estimated by the Multi-tissue clock  
663 (green), the Skin and Blood clock (orange) and the PhenoAge clock (yellow). Fitted lines are  
664 shown with 95% confidence intervals (semi-transparent). All three clocks show a trend to  
665 increase in predicted age with progressing passage, however there is considerable  
666 variability in predictions, particularly for the PhenoAge clock. The Multi-tissue clock  
667 consistently predicted cells to have the highest epigenetic age, while the PhenoAge clock

668 consistently predicted cells to have the lowest epigenetic age, which even reached below  
669 zero for several samples at various passages.

670 B) Heatmap representing 23 CpG probes that undergo hypomethylation with increasing cell  
671 passage and 19 CpGs that undergo hypermethylation with increasing cell passage. These  
672 42 CpG probes were used to develop the CellAgeClock. Probes that undergo  
673 hypomethylation and hypermethylation with increasing passage were separated and ordered  
674 by their methylation values per row. The mean absolute difference between passage 20 and  
675 passage 10 among clock CpGs is 0.2.

676 C) Testing the CellAgeClock on HMF and HDF samples that were not used to train the clock.  
677 The gray dashed line represents the diagonal (perfect prediction). The fitted line of the actual  
678 data is shown in blue, with a 95% confidence interval (semi-transparent). Cell passages are  
679 predicted accurately.

680

681 **Figure 2.** Using the CellAgeClock for the detection of anti-ageing drugs.

682 A) The CellAgeClock predictions of Human Dermal Fibroblasts (HDF) and

683 B) Human Mammary Fibroblasts (HMF). Represented is Predicted-Actual Passage for Passage  
684 16, 18 and 20, showing deceleration of the CellAgeClock upon treatment with anti-ageing  
685 drugs rapamycin (5nM), Dactolisib/BEZ235 (10nM), torin2 (5nM) and Trametinib (0.1nM).

686

687 **Figure 3.** Treatment with anti-ageing drugs decreases markers of senescence.

688 A) Schematic illustrating the experimental set-up conducted in P10 to P22 HMFs, passaged  
689 weekly.

690 B) Multi-parameter analysis of senescence markers. Colour coding used to illustrate the  
691 number of Z scores of the experimental drug value from the respective control mean.  
692 Scores highlighted in red denote a shift towards a more proliferative phenotype and  
693 scores highlighted in green denote a shift to a more senescent phenotype.

694 C) P22 HMFs stained with DAPI (blue) and Cell Mask, p21, p16, IL-6, or nucleolin (red), or  
695 SA- $\beta$ -Gal (blue) following 96-day treatment with 5nM Rapamycin, 10nM  
696 Dactolisib/BEZ235, 0.1nM Trametinib or their respective controls. Size bar, 100 $\mu$ m.

697

698 **Figure 4.** Drugs that decelerate the CellAgeClock extend lifespan *in vivo*.

699 A) Lifespan analysis on  $w^{Dah}$  background wild type flies fed with SYA food containing different  
700 concentration of rapamycin or ethanol as solvent control. For each condition, 150 flies were  
701 used.

702 B) Lifespan analysis on  $w^{Dah}$  background wild type flies fed with SYA food containing different  
703 concentration of Dactolisib/BEZ235 or DMSO as solvent control. For each condition, 150  
704 flies were used.

- 705 C) Lifespan analysis on  $w^{Dah}$  background wild type flies fed with SYA food containing different  
706 concentration of torin2 or DMSO as solvent control. For each condition, 150 flies were used.  
707 D) Schematic representation of our approach combining novel CellAgeClock and other ageing  
708 biomarkers *in vitro* primary human cell, together with *in vivo Drosophila* lifespan  
709 experiments, for a detailed and robust capture of anti-ageing drug potential.

710

## 711 **Supplemental Figure Legends**

712 **Supplemental Figure 1.** Drug treatment of HMF did not affect cell growth as measured by  
713 population doubling. Represented are population doubling measurements from passage 9  
714 to passage 21 for A) rapamycin (5nM), B) trametinib (0.1nM), C) Dactolisib/BEZ235  
715 (10nM), D) Torin2 (5nM) and corresponding vehicle controls.

716

## 717 **Supplemental Figure 2.**

718 A) Scheme for developing of the CellAge clock. A) Primary human mammary fibroblasts  
719 and dermal fibroblasts, from passages 10 to 20, were used for CpG methylation  
720 profiling and using elastic net regression 42 CpGs were selected to develop the  
721 CellAgeClock that predicts cell passage.

722 B) The beanplots showing the overall distribution of DNA methylation values (all CpGs,  
723  $n=736,001$ ) are presented. Overall DNA methylation levels decrease with increasing  
724 cell passage. The lines show where the clock CpGs sit in the distributions (mean per  
725 passage group), and are connected across passages to see how their methylation  
726 levels change. The plots show the mean methylation changes the clock CpGs are  
727 undergoing with increasing passage, separated by those that become hypo- and  
728 hypermethylated, in the contextof the global DNA methylation patterns of all CpGs.

729 C) Barplots showing the percentage of CpGs falling into the corresponding genomic  
730 feature. Lighter bars show the percentages of clock CpGs (x% of the 42 CpGs). Darker  
731 bars show the background distribution (all other CpGs analyzed = 735,959 CpGs).  
732 Clock CpGs fall more often into IGRs. Barplots on the left are separated into gene  
733 promoters, gene bodies and IGRs for which in the CellAgeClock CpGs we found 12, 14  
734 and 16, respectively. More detailed separation of the CellAgeClock CpGs into 5'UTR (2  
735 CpGs), TSS200 (1 CpG), TSS1500 (7 CpGs), 1<sup>st</sup> exon (2 CpGs), gene body (13 CpGs)  
736 and 3'UTR (1CpG) and IGR (16 CpG).

737

738 **Supplemental Figure 3.** Western blot analysis on HMFs treated with anti-ageing drugs.  
739 Western blots were probed for phospho-S6K (Thr 389) showing p85 S6K Thr412 and lower  
740 band p70 S6K Thr389, total S6K, phospho-4EBP (Thr37/46), non-phospho-4EBP, pERK  
741 (Thr202/Tyr204), total ERK, and H3 as a loading control. Western blots analysis of A) HMF  
742 passage 10 and B) HMF passage 14 C) HMF passage 14 only 8h treatment with anti-  
743 ageing drugs. The analysis reflect rapid (S6K) and slower (4EBP) decreases in  
744 phosphorylation, increased phosphorylation (Akt Ser 473 and Akt Thr308) owing to S6K-  
745 IRS negative feedback loop, and resilience to phosphorylation changes owing to pMEK  
746 rebound and pERK feedback reactivation.

747

748 **Supplemental Figure 4.**

749 A) A scatterplot of the cumulative population doubling against the actual passage for control  
750 and rapamycin samples.

751 B) A scatterplot of the cumulative population doubling against the predicted passage from  
752 CellAge for control and rapamycin samples.

753

754 **Supplemental Figure 5.** Predicted age of control samples and samples treated with  
755 potential anti-ageing drugs using three existing epigenetic clocks.

756 Predictions of epigenetic age made using the Multi-Tissue (A1-D1, green), Skin & Blood  
757 (A2-D2, orange) and PhenoAge (A3-D3, yellow) clocks. Age predictions are indicated for  
758 samples treated with rapamycin (A1-A3), Dactolisib/BEZ235 (B1-B3), trametinib (C1-C3),  
759 torin2 (D1-D3), as compared with the set of control samples. These comparisons show that  
760 the existing clocks do not consistently indicate the anti-ageing effects of these treatments  
761 on cultured cells.

762

763

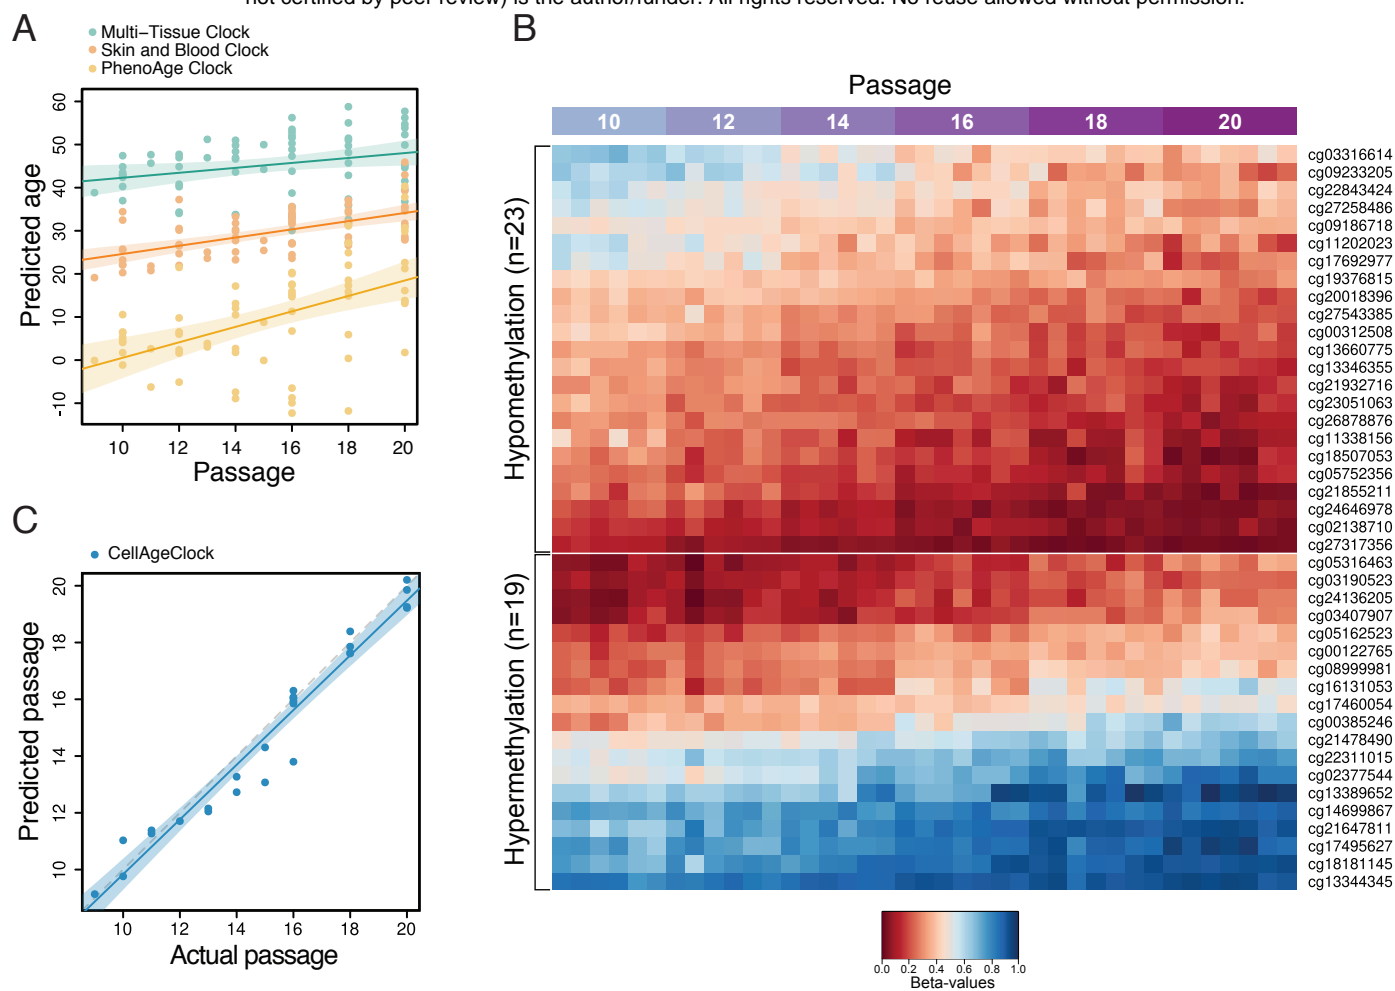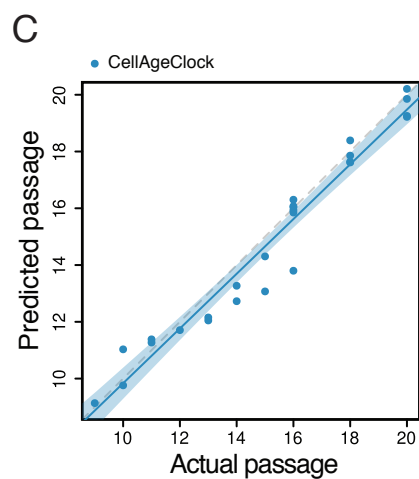

Figure 1.

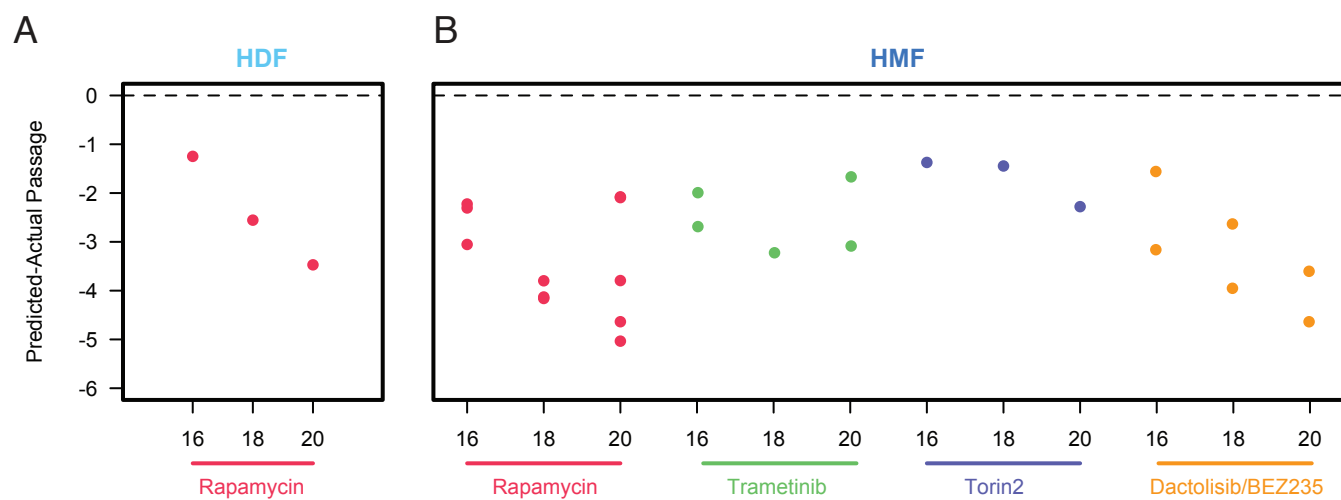

Figure 2.

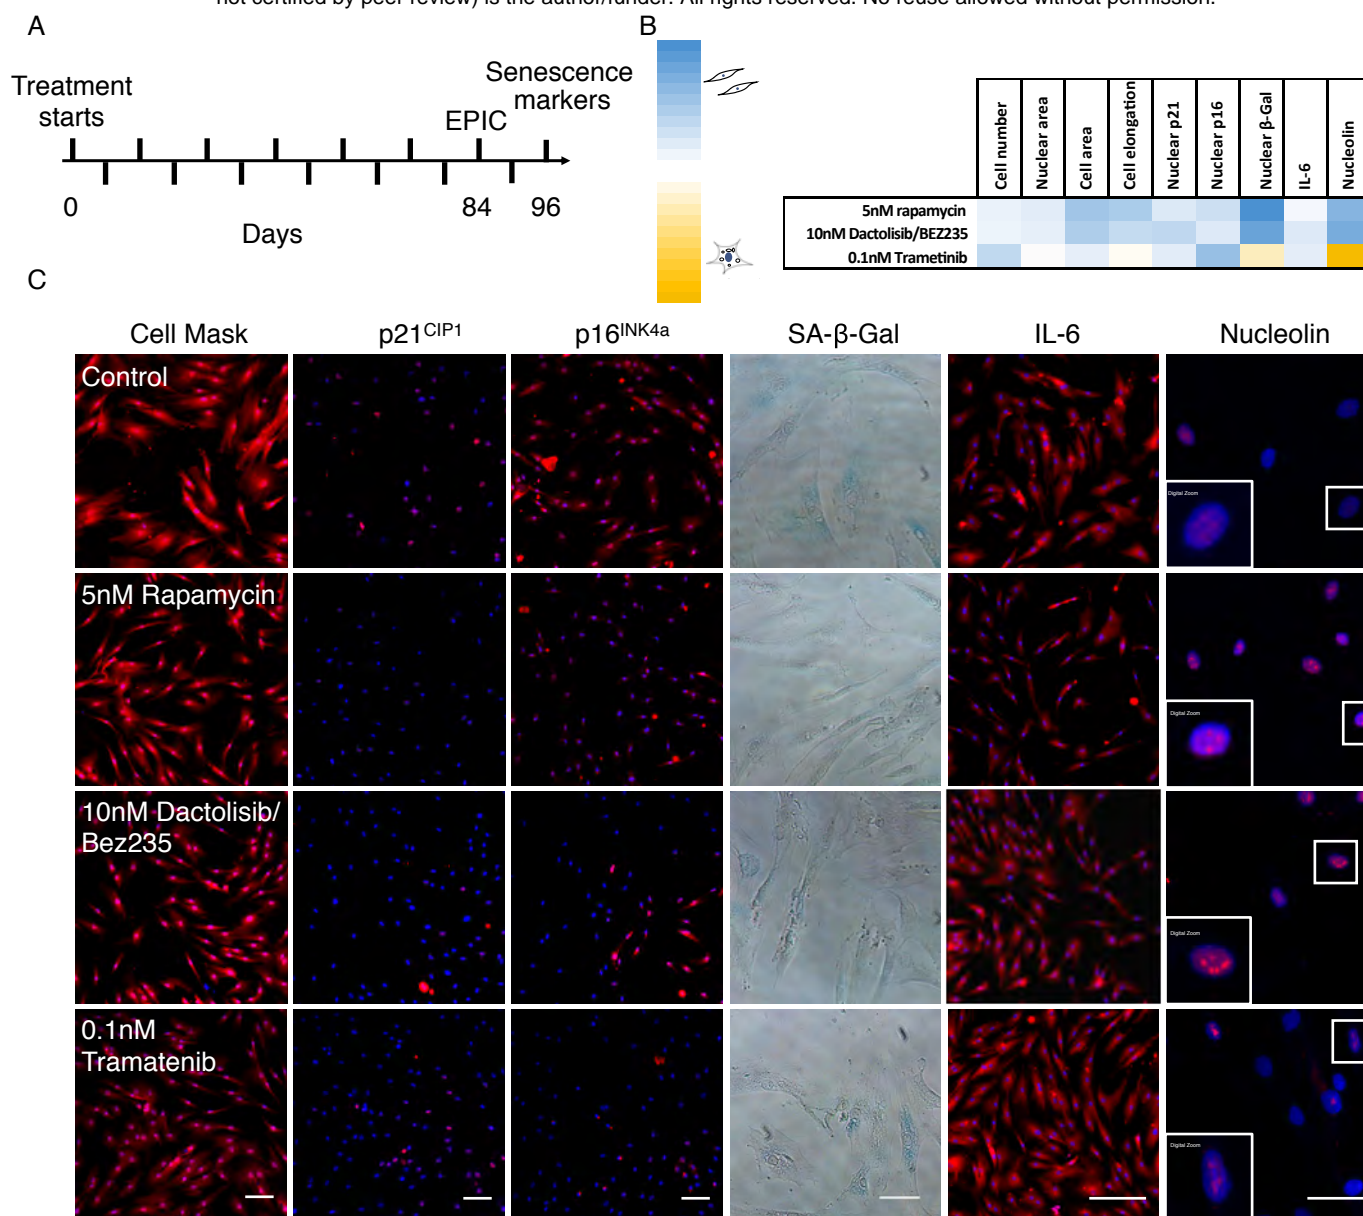

Figure 3

A

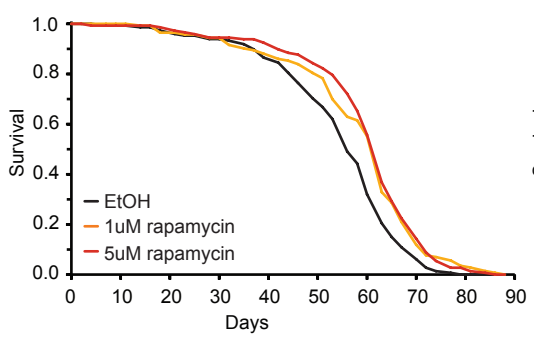

B

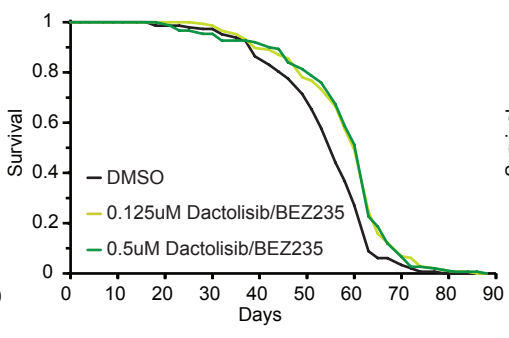

C

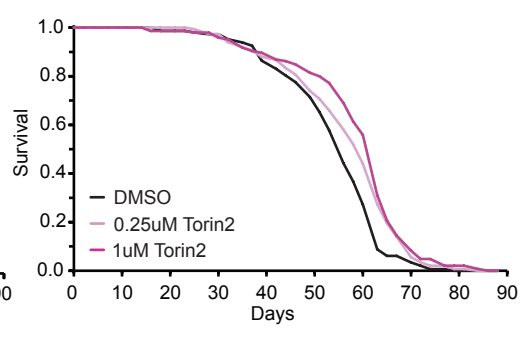

D

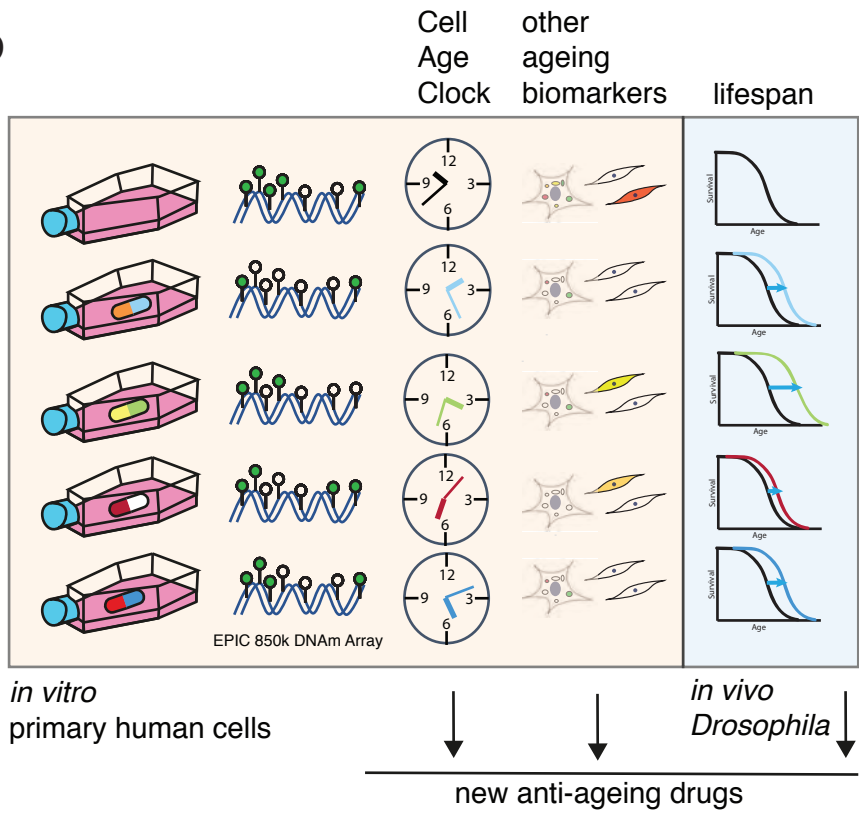

Figure 4



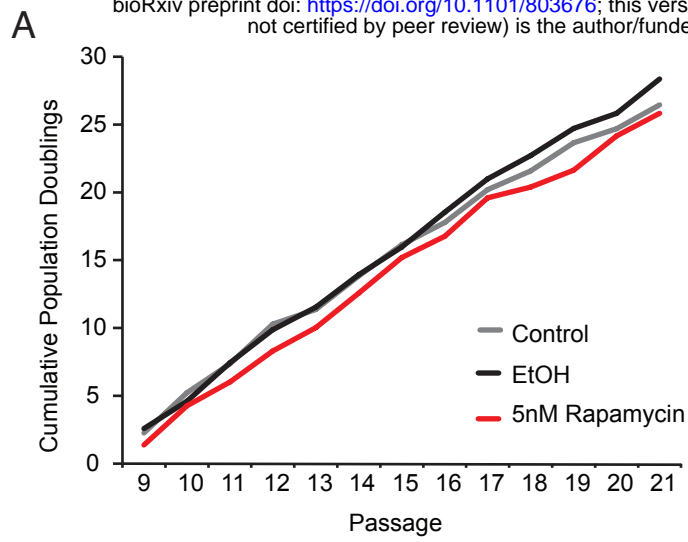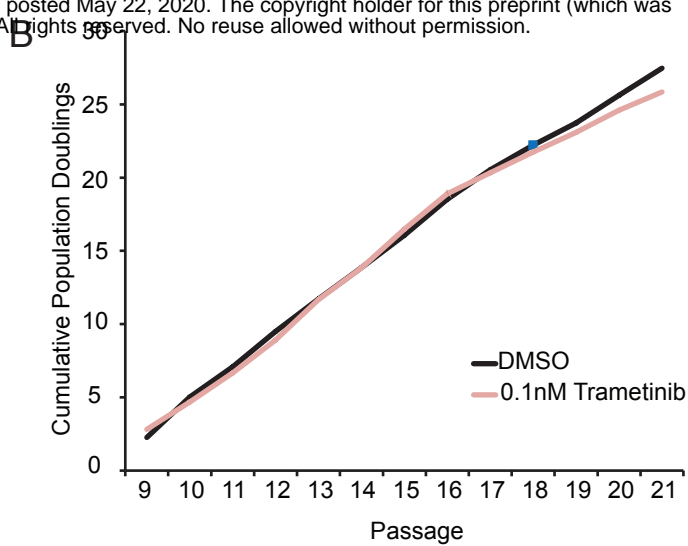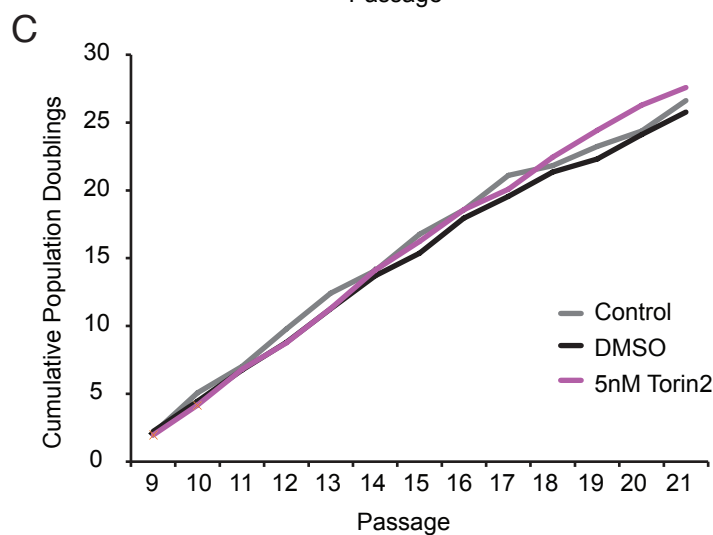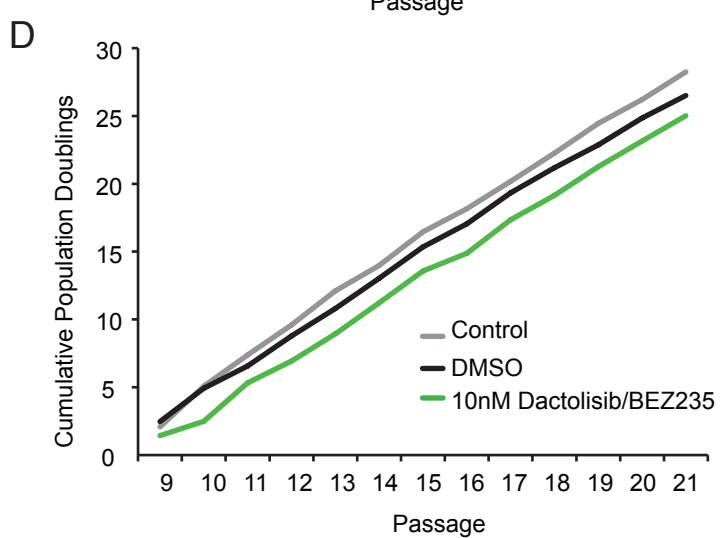

Supplemental Fig.1.

A

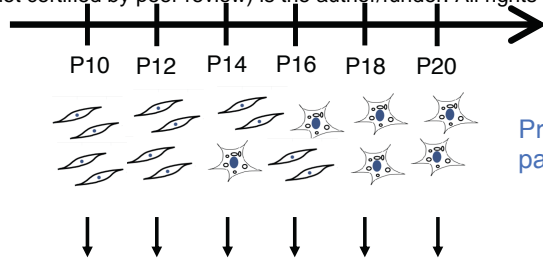

Primary human fibroblasts (HMF and HDF) from passages 10 to 20 were used for CpG methylation profiling.

gDNA, Illumina EPIC CpG methylation platform

Identification CpGs undergoing DNA methylation changes with increasing cell passage using linear regression.

Preselected 2,543 CpGs were used to build the clock model by elastic net regression.

42 CpGs were selected to develop the CellAgeClock that predicts cell passage.

The CellAgeClock was then used on a separate dataset of HMF and HDF samples for the validation of accurate passage prediction and on samples that were treated with anti-ageing drugs.

B

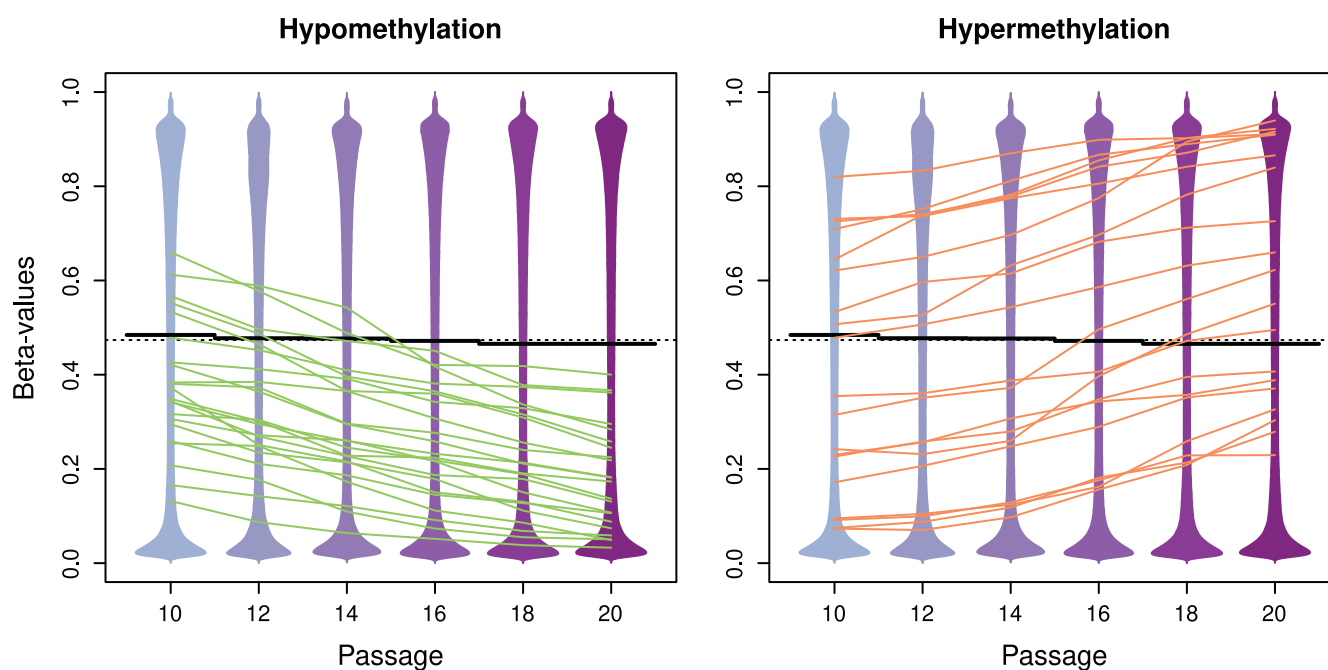

C

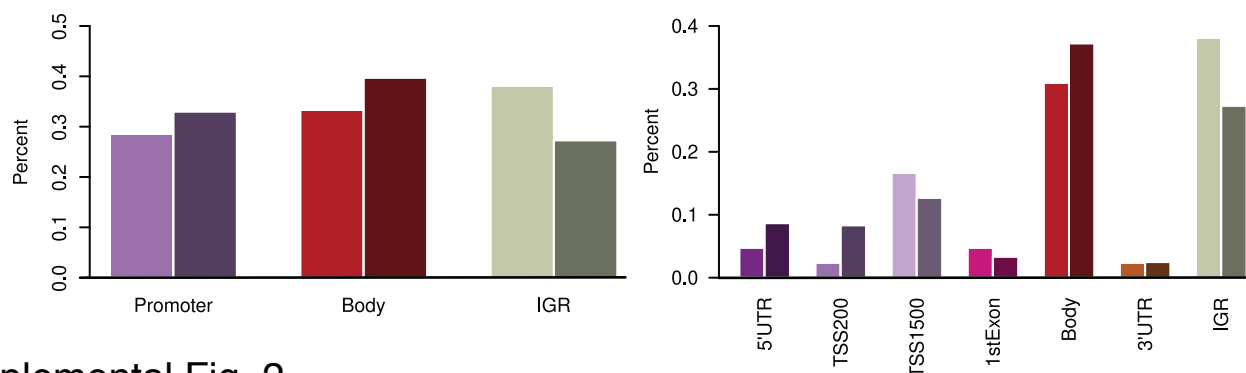

Supplemental Fig. 2.

A

Fibroblasts  
P10

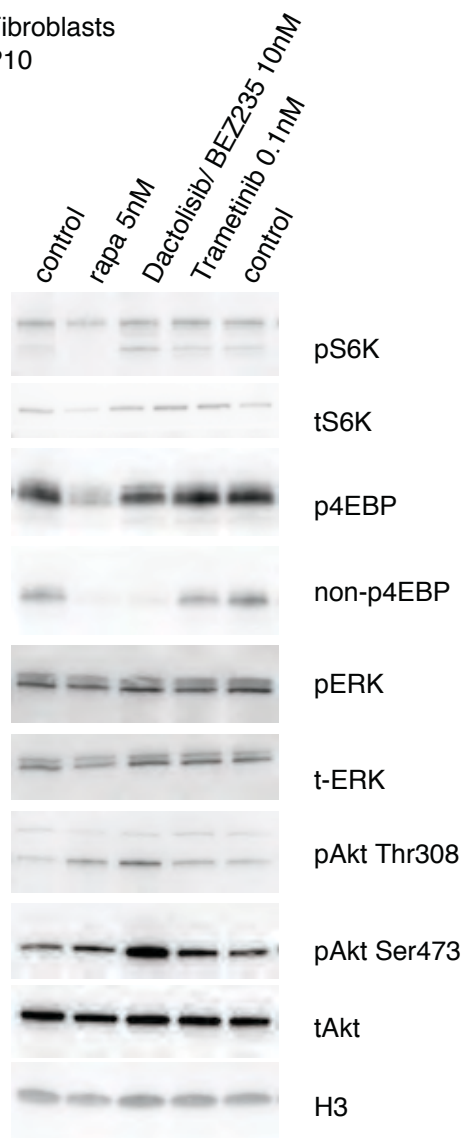

B

Fibroblasts  
P14

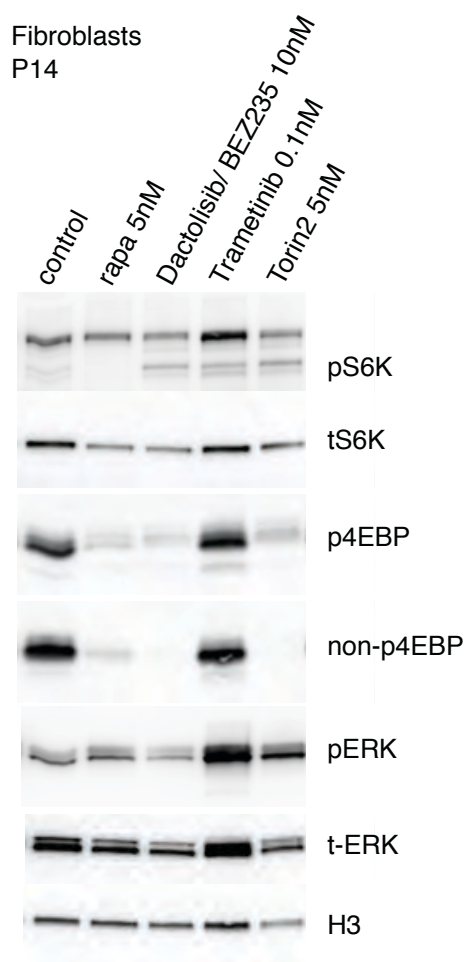

C

Fibroblasts  
P14 8h treatment

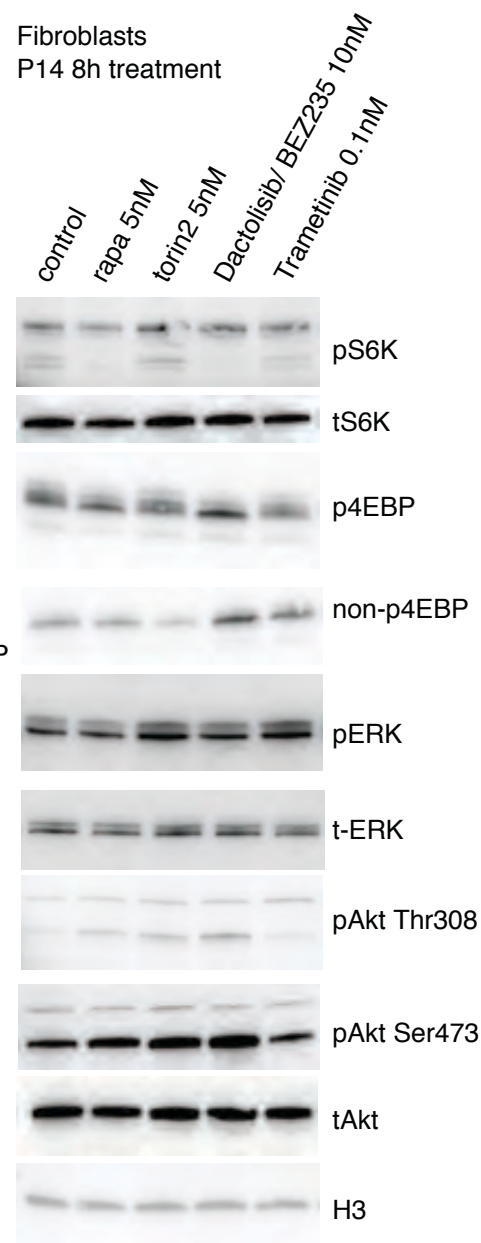

Supplemental Fig. 3

A

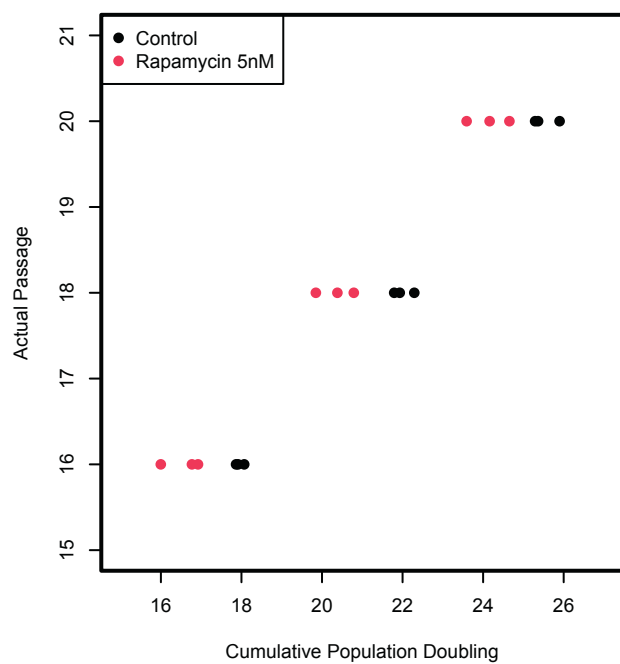

B

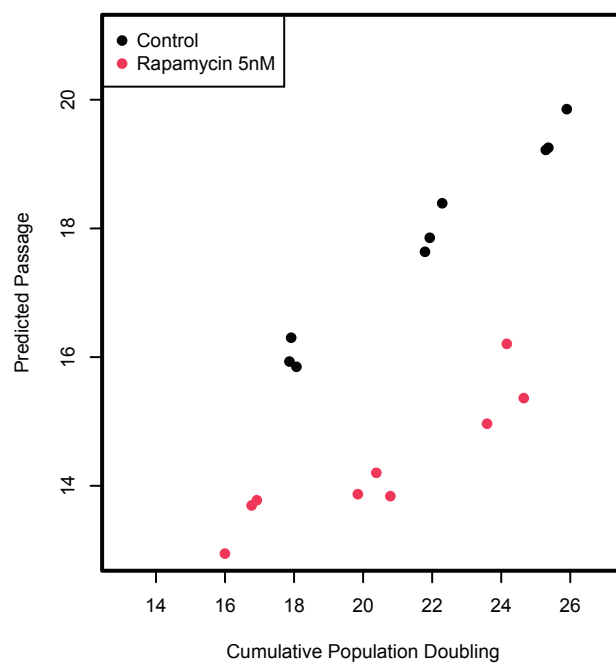

Supplemental Fig. 4.

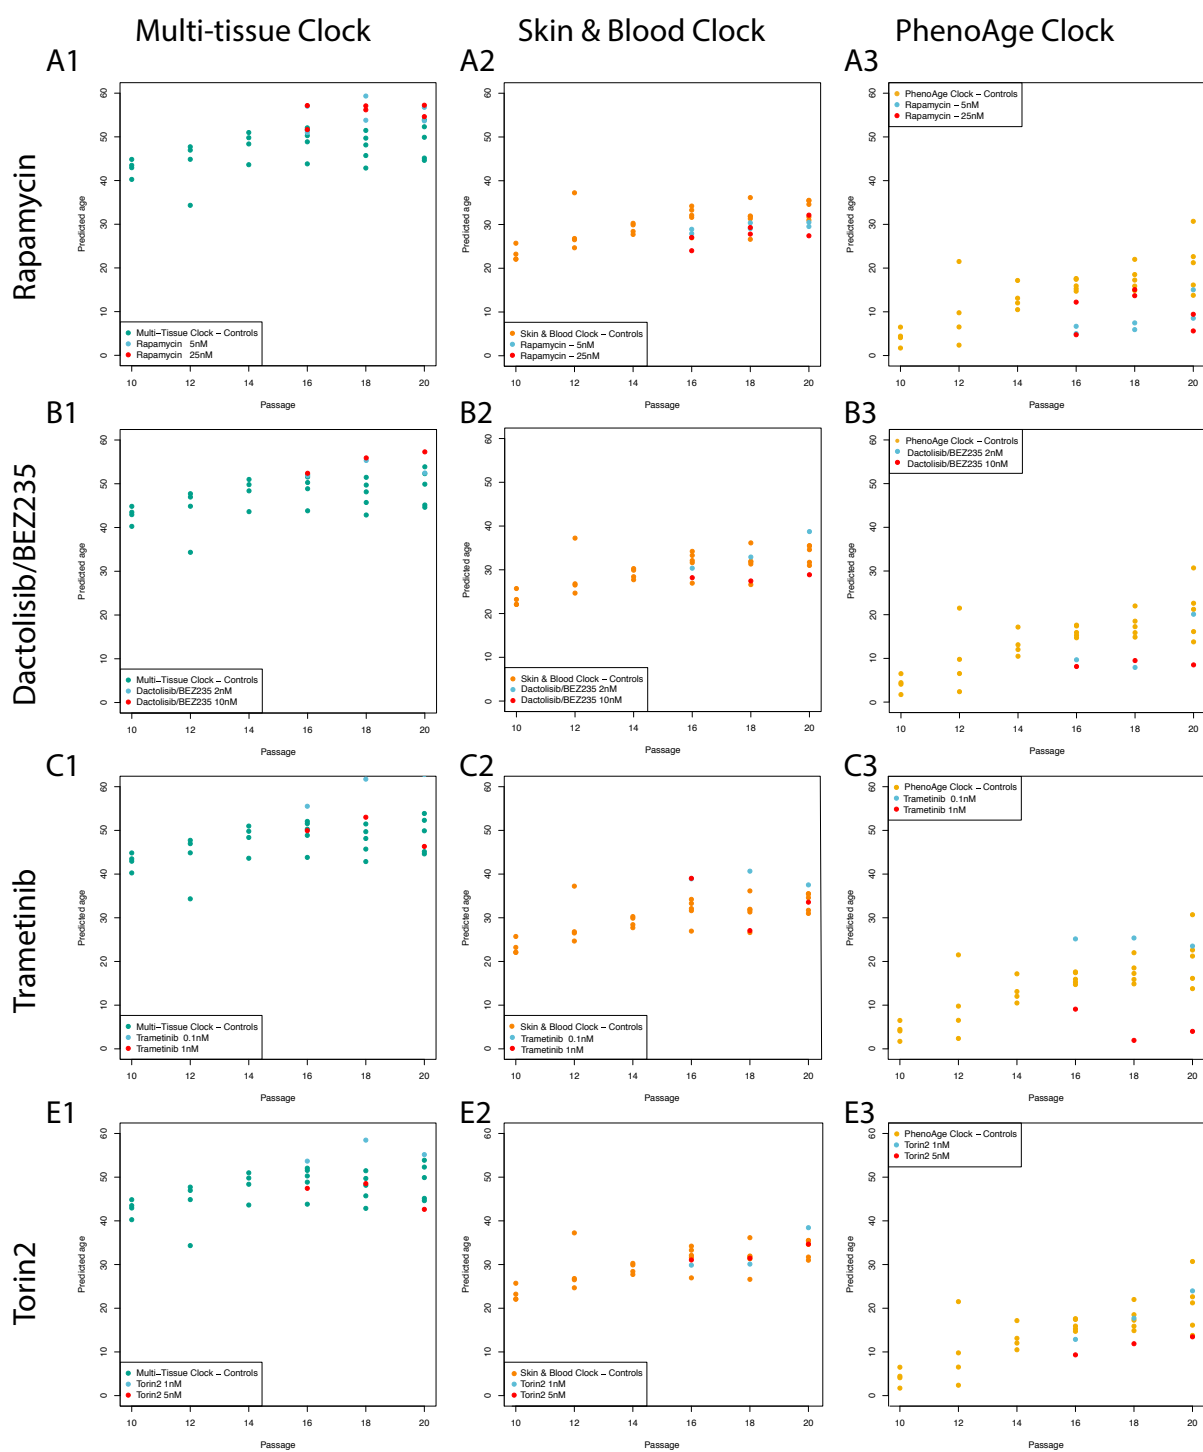

Supplemental Fig. 5
