# Supplementary material for: A CellAgeClock for expedited discovery of anti-ageing compounds
Source: bioRxiv or medRxiv preprint supplement (doi:10.1101/803676), 2020-05-22
Supplement: Supplementary file [file media-2.pdf]

**Supplemental Table 2:** Spearman's rank correlation and RMSE of the different clocks' predictions with actual cell passage of 26 samples that were not used to build the clock.

| Clock                | Spearman's Rho | p-value   | RMSE  |
|----------------------|----------------|-----------|-------|
| Multi-tissue clock   | 0.41           | 0.03837   | 33.21 |
| PhenoAge clock       | 0.62           | 0.00070   | 14.01 |
| Skin and Blood clock | 0.81           | 4.8e-07   | 11.89 |
| CellAgeClock         | 0.98           | < 2.2e-16 | 0.79  |
